# Supplementary material for: Machine Learning Methods for Predicting Human-Adaptive Influenza A Viruses Based on Viral Nucleotide Compositions
Source: PubMed Central journal article supplement (PMC7086167; doi:10.1093/molbev/msz276), 2019-11-21

1 **Supplemental information**

- 2 **1. Supplemental information presents detailed information of supplemental**  
3 **results, supplemental Methods, supporting materials and programming**  
4 **scripts for supplemental information.**
- 5 **2. Supplemental results include the description about Supplemental tables, the**  
6 **legends of supplemental Figures, Supplemental tables and supporting data.**
- 7 **3. Supplemental Methods described in details about Feature Engineering and**  
8 **sequence resampling.**
- 9 **4. Supplemental Figures were uploaded as independent files. Supplemental**  
10 **Figure 19 with high resolution was provided at**  
11 **[https://github.com/Jamalijama/Predict\\_IAV\\_Host](https://github.com/Jamalijama/Predict_IAV_Host).**
- 12 **5. Supporting data for figures, supplemental figures and programming scripts**  
13 **were also provided respectively.**

## 14 Supplemental results

### 15 1. Supplemental Tables

#### 16 Supplemental table 1. List of the full-length IAV coding sequences within the 17 length range.

18 Sequence samples with the labels of Host, Subtype and Segment were listed, post the  
19 dropout of 8,634 sequences, due to the length range or the repeated sequence IDs. The  
20 length range was set as  $\text{mean} \pm 3 * \text{std}$  ( $2280 \pm 9$ ,  $2274 \pm 9$ ,  $2151 \pm 9$ ,  $1695 \pm 27$ ,  $1497$   
21  $\pm 9$  and  $1380 \pm 33$ , respectively for PB2, PB1, PA, HA, NP and NA).

#### 22 Supplemental Table 2-7, cv\_score and its rolling mean for ML models for 6 23 segments.

24 The cv\_score and its rolling mean (moving average) 3 (MA3) were listed for the  
25 model of GBRT, MLP, RFC and SVC respectively. For PB1 with MLP model, the  
26 second downcross of cv\_score with its MA3 (at the 11<sup>th</sup> feature number) was designated  
27 as the threshold. In another word, the best feature number indicated by the MLP model  
28 for PB1 was 10. For all models for the six segments, the cv\_score and its MA3 value  
29 were listed respectively.

30

### 31 2. Legends for supplemental Figures

#### 32 Supplemental Figure 1. Numbers of the full-length IAV coding sequences from 33 different countries/areas, hosts, subtypes, segments and years.

34 List of all the full-length influenza A virus (IAV) coding sequences since December 31<sup>st</sup>,  
35 2018. Samples from different countries/areas (A), hosts (B), subtypes (C), segments (D)  
36 and years (E) were counted and presented as histograms. Values were sorted on a  
37 descending turn, and the y-axis was set with logarithmic tick for figure subpart A and  
38 E, with linear tick for others.

39

#### 40 Supplemental Figure 2. Distribution of the IAV sequences, post a random 41 resampling, in the labels of countries/areas, hosts, subtypes, segments and years.

42 A random resampling was performed to keep an approximate sample ratio of 1:1 for  
43 the country of the USA and China. Samples from different countries/areas (A), hosts  
44 (B), subtypes (C), segments (D) and years (E) were counted and presented as  
45 histograms. Values were sorted with a descending turn, and the y-axis was set with  
46 logarithmic tick for figure subpart A and E, with linear tick for others.

47

#### 48 Supplemental Figure 3. Heatmap and hierarchical clustering of randomly- 49 sampled human and avian IAV sequences basing on the Euclidean distance of the 50 60 (d)nts.

51 59-61 sequence samples were randomly (random state = 1) selected from each  
52 segment sequence set (3.59‰ to 5.01‰ of total sequences), and then were clustered  
53 with heatmap and hierarchical clustering for PB2 (A) and the other 5 segments (B-F),  
54 based on the Euclidean distance of the 48 di-nucleotides and the 12 mono-nucleotides

55 respectively; Sequence identity and (d)nts were clustered respectively. Standardized  
56 scaling was performed for data with the function of  $(x-x.\text{mean})/x.\text{std}$ . Color in the  
57 heatmap presented the value for each (d)nt in x-axis, as showing by the color bar in the  
58 left-top. The hierarchical relationships for the sampled sequences and for (d)nts were  
59 respectively indicated in the left and top side in each image. The red-blue column in the  
60 left of heatmap was utilized to show the human (red) and avian (blue) group.

61

62 **Supplemental Figure 4. Phylogenetic analysis of randomly-sampled IAV sequences**  
63 **with maximum likelihood method.**

64 59-61 sequence samples were randomly (random state = 1) selected from each  
65 segment sequence set (3.59‰ to 5.01‰ of total sequences), and then were utilized for  
66 phylogenetic analysis with MEGA software (MEGA 7.0.26), for PB2 (A), PB1 (B), PA  
67 (C), HA (D), NP (E) and NA (F). The sequence ID was indicated as segment, subtype  
68 and the strain name from left to right, respectively; the slash “/” in strain name was  
69 automatically replaced with a blank by MEGA software.

70

71 **Supplemental Figure 5. PCA analysis of the 60 (d)nts between human and avian**  
72 **IAV sequences**

73 The 48 dnts and the 12 nts for PB2 (A), PB1 (B), PA (C), HA (D), NP (E) or NA (F)  
74 were converted into two principal components and then were plotted with pairplot  
75 (seaborn package, python) (left-down and right-up in each figure subpart). The  
76 distribution of principal component 1 (PCA\_1) and 2 (PCA\_2) of avian (blue) and  
77 human (orange) sequences was indicated by kernel density estimation (KDE) (left-up  
78 and right-down in each figure subpart), and the separability between avian and human  
79 sequences was shown respectively for the six segments (A-F) , with the pairplot and  
80 KDE.

81

82 **Supplemental Figure 6. Sampling times for each of the 60 (d)nts for the PCA / SVC**  
83 **optimizer for each segment.**

84 Characterization of human adaption-associated nucleotide composition of IAVs from  
85 the 60 (d)nts was performed with combined PCA and SVC. Independent performing  
86 times for each (d)nt for the six segments (A-F) in the 3540 iterations of PCA/SVC.

87

88 **Supplemental Figure 7. Sorting of the 60 (d)nts by the PCA / SVC optimizer for**  
89 **each segment.**

90 3540 iterations of PCA/SVC were performed with randomly-selected four of the 60  
91 (d)nts reduced into one component classify avian and human IAV sequences. The  
92 importance of each (d)nt was sorted according to their area under curve (AUC) score  
93 of PCA/SVC (A-F).

94

95 **Supplemental Figure 8. Difference in the PCA/SVC-optimized (d)nts between**  
96 **avian and human IAV segment sequences.**

97 The relative levels of the 9-13 optimized (d)nts for avian (A) and human (H)  
98 sequences were plotted with boxplot, for PB2 (A), PB1 (B), PA (C), HA (D), NP (E)

99 and NA (F). The top whisker, the top boarder, the middle line, the bottom boarder and  
100 the bottom whisker were respectively presented the maximum value, 75%-, 50%- and  
101 25%- quantile values and the minimum value, and in which outliers were indicated as  
102 diamonds.

103 **Supplemental Figure 9. PCA analysis of the optimized (d)nts for PA and HA**  
104 **between human and avian IAV sequences**

105 The optimized 11 and 13 (d)nts for PA (A) and HA (B), respectively, were converted  
106 into two principal components and then were plotted with pairplot (seaborn package,  
107 python) (left-down and right-up in each figure subpart). The distribution of principal  
108 component 1 (PCA\_1) and 2 (PCA\_2) of avian (blue) and human (orange) sequences  
109 was indicated by kernel density estimation (KDE) (left-up and right-down in each  
110 figure subpart), and the separability between avian and human sequences was shown  
111 respectively for PA (A) and HA (B), with the pairplot and KDE.

112

113 **Supplemental Figure 10. PCA analysis of the optimized (d)nts for NP and NA**  
114 **between human and avian IAV sequences**

115 The optimized 10 and 9 (d)nts for NP (A) and NA (B), respectively, were converted  
116 into two principal components and then were plotted with pairplot (seaborn package,  
117 python) (left-down and right-up in each figure subpart). The distribution of principal  
118 component 1 (PCA\_1) and 2 (PCA\_2) of avian (blue) and human (orange) sequences  
119 was indicated by kernel density estimation (KDE) (left-up and right-down in each  
120 figure subpart), and the separability between avian and human sequences was shown  
121 respectively for NP (A) and NA (B), with the pairplot and KDE.

122

123 **Supplemental Figure 11-15. Heatmap and hierarchical clustering of human and**  
124 **avian IAV sequences basing on the Euclidean distance of the optimized (d)nts.**

125 59-61 sequence samples were randomly (random state = 1) selected from PB1, PA,  
126 HA, NP and NA (respectively for **Supplemental** Figure 11-15) and then were clustered  
127 with heatmap and hierarchical clustering, based on the Euclidean distance of the  
128 optimized 12, 11, 13, 10 and 9 (d)nts, respectively for PB1, PA, HA, NP and NP;  
129 Sequence identity and (d)nts were clustered respectively. Standardized scaling was  
130 performed for data with the function of  $(x-x.mean)/x.std$ . Color in the heatmap  
131 presented the value for each (d)nt in x-axis, as showing by the color bar in the left-top.  
132 The hierarchical relationships for the sampled sequences and for (d)nts were  
133 respectively indicated in the left and top side in each image. The red-blue column in the  
134 left of heatmap was utilized to show the human (red) and avian (blue) group.

135

136 **Supplemental Figure 16-18. The prediction of human adaption classes (True/False)**  
137 **and the human adaption probability by the GBRT, MLP or RFC model, with**  
138 **optimized (d)nts for the six segments.**

139 The human adaption classes (True/False) and the human adaption probability of  
140 avian and human sequences were predicted by SVC with the optimized (best) 9, 12, 11,  
141 13, 10 and 9 (d)nts respectively for PB2, PB1, PA, HA, NP and NP, with same  
142 optimized-(d)nt number of tail (worst) (d)nts as control, respectively. The confusion

143 matrix of human adaption class prediction, the Receiver Operating Characteristic (ROC)  
144 and Area Under ROC Curve (AUC) for the GBRT (**Supplemental** Figure 16), MLP  
145 (**Supplemental** Figure 17) or RFC (**Supplemental** Figure 18), model with the worst or  
146 with the best (d)nts were indicated respectively for PB2 (A), PB1 (B), PA (C), HA (D),  
147 NP (E) and NA (F).

148

149 **Supplemental Figure 19. Heatmap and hierarchical clustering of randomly-**  
150 **sampled IAV sequences before with pd09H1N1 sequences basing on the Euclidean**  
151 **distance of the 60 (d)nts.**

152 1000 IAV sequences were randomly-resampled (random state = 1) from the IAV  
153 sequences before 2009 for each segment, and then were clustered with the pd09H1N1  
154 sequences by the heatmap and hierarchical clustering methods for PB2 (A), PB1 (B),  
155 PA (C), HA (D), NP (E) and NA (F), respectively, based on the Euclidean distance of  
156 the optimized 9, 12, 11, 13, 10, 9 (d)nts respectively. H1N1 IAV virus strains isolated  
157 on April, 2009 in USA were taken as example sequences. The labels of sequence ID,  
158 host, subtype, year, country/area and human-adaption probability were isolated from  
159 the sequence name and were indicted as a mixed sequence ID in the Heatmap and  
160 hierarchical clustering. Host for all sequences was also indicated as blue (avian or  
161 human), green (swine), red (avian or human) and white (pd09H1N1) respectively.

162

### 3. Supplemental tables

Supplemental table 1. Numbers of the sequence with the label of segment, host and subtype

| Host                | Subtypes | Sequence number for each segment |        |        |        |        |        | Total   | Total   |
|---------------------|----------|----------------------------------|--------|--------|--------|--------|--------|---------|---------|
|                     |          | PB2                              | PB1    | PA     | HA     | NP     | NA     |         |         |
| Avian               | H1N1     | 387                              | 380    | 354    | 275    | 328    | 363    | 2,087   | 68,739  |
|                     | H3N2     | 223                              | 225    | 230    | 198    | 199    | 207    | 1,282   |         |
|                     | Others   | 12,236                           | 11,993 | 11,814 | 11,685 | 10,478 | 7,164  | 65,370  |         |
| Human               | H1N1     | 7,274                            | 7,043  | 7,379  | 13,426 | 5,949  | 7,960  | 49,031  | 113,820 |
|                     | H3N2     | 9,400                            | 9,343  | 8,975  | 13,956 | 7,948  | 11,826 | 61,448  |         |
|                     | Others   | 505                              | 470    | 502    | 776    | 488    | 600    | 3,341   |         |
| Swine               | H1N1     | 1,746                            | 1,820  | 1,687  | 3,579  | 1,832  | 3,409  | 14,073  | 34,990  |
|                     | H3N2     | 1,293                            | 1,303  | 1,212  | 2,336  | 1,274  | 2,203  | 9,621   |         |
|                     | Others   | 1,340                            | 1,298  | 1,269  | 3,198  | 1,321  | 2,870  | 11,296  |         |
| <b>Total_Avian</b>  | H1N1     | 12,846                           | 12,598 | 12,398 | 12,158 | 11,005 | 7,734  | 68,739  |         |
| <b>Total_Human</b>  | H3N2     | 17,179                           | 16,856 | 16,856 | 28,158 | 14,385 | 20,386 | 113,820 | 217,549 |
| <b>Total_Others</b> | Others   | 4,379                            | 4,421  | 4,168  | 9,113  | 4,427  | 8,482  | 34,990  |         |
| <b>Total</b>        | /        | 34,404                           | 33,875 | 33,422 | 49,429 | 29,817 | 36,602 | 217,549 | /       |

Supplemental Table 2 Cross\_validation score and its moving average level for PB2 genomic sequences by Gradient Boosted Regression Trees (GBRT), Multiple Layer Perception Classifier (MLP), Random Forest Classifier (RFC) and support vector classifier (SVC).

| (d)nt_n | GBRT  |         | MLP   |         | RFC   |         | SVC   |         |
|---------|-------|---------|-------|---------|-------|---------|-------|---------|
|         | cv_sc | MA3_cv_ | cv_sc | MA3_cv_ | cv_sc | MA3_cv_ | cv_sc | MA3_cv_ |
| um      | ore   | score   | ore   | score   | ore   | score   | ore   | score   |
| 0       | 0.872 | 0.872   | 0.839 | 0.839   | 0.872 | 0.872   | 0.571 | 0.571   |
| 1       | 0.964 | 0.918   | 0.941 | 0.89    | 0.963 | 0.918   | 0.891 | 0.731   |
| 2       | 0.979 | 0.938   | 0.961 | 0.914   | 0.98  | 0.939   | 0.865 | 0.776   |
| 3       | 0.992 | 0.978   | 0.983 | 0.962   | 0.993 | 0.979   | 0.913 | 0.89    |
| 4       | 0.993 | 0.988   | 0.977 | 0.974   | 0.993 | 0.989   | 0.934 | 0.904   |
| 5       | 0.994 | 0.993   | 0.979 | 0.98    | 0.995 | 0.994   | 0.971 | 0.939   |
| 6       | 0.995 | 0.994   | 0.978 | 0.978   | 0.995 | 0.994   | 0.966 | 0.957   |
| 7       | 0.995 | 0.994   | 0.984 | 0.98    | 0.995 | 0.995   | 0.966 | 0.968   |
| 8       | 0.995 | 0.995   | 0.967 | 0.977   | 0.995 | 0.995   | 0.967 | 0.966   |
| 9       | 0.995 | 0.995   | 0.986 | 0.979   | 0.996 | 0.995   | 0.969 | 0.967   |
| 10      | 0.995 | 0.995   | 0.988 | 0.98    | 0.996 | 0.995   | 0.972 | 0.969   |
| 11      | 0.995 | 0.995   | 0.989 | 0.988   | 0.995 | 0.995   | 0.976 | 0.972   |
| 12      | 0.995 | 0.995   | 0.991 | 0.989   | 0.996 | 0.995   | 0.972 | 0.973   |
| 13      | 0.995 | 0.995   | 0.987 | 0.989   | 0.996 | 0.995   | 0.974 | 0.974   |
| 14      | 0.995 | 0.995   | 0.99  | 0.989   | 0.995 | 0.995   | 0.974 | 0.973   |
| 15      | 0.995 | 0.995   | 0.987 | 0.988   | 0.995 | 0.995   | 0.972 | 0.973   |
| 16      | 0.995 | 0.995   | 0.99  | 0.989   | 0.995 | 0.995   | 0.989 | 0.978   |
| 17      | 0.995 | 0.995   | 0.99  | 0.989   | 0.995 | 0.995   | 0.989 | 0.983   |
| 18      | 0.995 | 0.995   | 0.988 | 0.99    | 0.995 | 0.995   | 0.989 | 0.989   |
| 19      | 0.994 | 0.994   | 0.988 | 0.989   | 0.996 | 0.995   | 0.989 | 0.989   |
| 20      | 0.995 | 0.994   | 0.989 | 0.989   | 0.996 | 0.996   | 0.99  | 0.989   |
| 21      | 0.995 | 0.994   | 0.989 | 0.989   | 0.996 | 0.996   | 0.99  | 0.99    |
| 22      | 0.995 | 0.995   | 0.99  | 0.99    | 0.996 | 0.996   | 0.99  | 0.99    |
| 23      | 0.995 | 0.995   | 0.99  | 0.99    | 0.995 | 0.996   | 0.99  | 0.99    |
| 24      | 0.995 | 0.995   | 0.99  | 0.99    | 0.996 | 0.996   | 0.99  | 0.99    |
| 25      | 0.995 | 0.995   | 0.992 | 0.99    | 0.995 | 0.996   | 0.99  | 0.99    |
| 26      | 0.995 | 0.995   | 0.989 | 0.99    | 0.995 | 0.996   | 0.99  | 0.99    |
| 27      | 0.995 | 0.995   | 0.989 | 0.99    | 0.996 | 0.996   | 0.99  | 0.99    |
| 28      | 0.995 | 0.995   | 0.989 | 0.989   | 0.995 | 0.995   | 0.99  | 0.99    |
| 29      | 0.995 | 0.995   | 0.988 | 0.989   | 0.996 | 0.996   | 0.99  | 0.99    |
| 30      | 0.995 | 0.995   | 0.99  | 0.989   | 0.996 | 0.996   | 0.989 | 0.99    |
| 31      | 0.995 | 0.995   | 0.99  | 0.99    | 0.996 | 0.996   | 0.99  | 0.99    |
| 32      | 0.995 | 0.995   | 0.989 | 0.99    | 0.996 | 0.996   | 0.99  | 0.99    |
| 33      | 0.994 | 0.995   | 0.99  | 0.99    | 0.996 | 0.996   | 0.991 | 0.99    |
| 34      | 0.995 | 0.995   | 0.99  | 0.989   | 0.995 | 0.996   | 0.99  | 0.99    |
| 35      | 0.995 | 0.995   | 0.99  | 0.99    | 0.996 | 0.996   | 0.99  | 0.99    |
| 36      | 0.995 | 0.995   | 0.993 | 0.991   | 0.996 | 0.996   | 0.991 | 0.991   |

|    |       |       |       |       |       |       |       |       |
|----|-------|-------|-------|-------|-------|-------|-------|-------|
| 37 | 0.995 | 0.995 | 0.992 | 0.992 | 0.996 | 0.996 | 0.991 | 0.991 |
| 38 | 0.995 | 0.995 | 0.99  | 0.992 | 0.996 | 0.996 | 0.991 | 0.991 |
| 39 | 0.995 | 0.995 | 0.993 | 0.992 | 0.996 | 0.996 | 0.991 | 0.991 |
| 40 | 0.996 | 0.995 | 0.991 | 0.991 | 0.996 | 0.996 | 0.991 | 0.991 |
| 41 | 0.996 | 0.996 | 0.993 | 0.992 | 0.995 | 0.996 | 0.991 | 0.991 |
| 42 | 0.994 | 0.995 | 0.987 | 0.99  | 0.996 | 0.996 | 0.991 | 0.991 |
| 43 | 0.996 | 0.995 | 0.991 | 0.99  | 0.996 | 0.996 | 0.991 | 0.991 |
| 44 | 0.995 | 0.995 | 0.99  | 0.989 | 0.996 | 0.996 | 0.991 | 0.991 |
| 45 | 0.995 | 0.995 | 0.99  | 0.99  | 0.996 | 0.996 | 0.991 | 0.991 |
| 46 | 0.996 | 0.995 | 0.994 | 0.991 | 0.996 | 0.996 | 0.991 | 0.991 |
| 47 | 0.995 | 0.995 | 0.991 | 0.991 | 0.996 | 0.996 | 0.991 | 0.991 |
| 48 | 0.995 | 0.995 | 0.992 | 0.992 | 0.996 | 0.996 | 0.991 | 0.991 |
| 49 | 0.996 | 0.995 | 0.994 | 0.992 | 0.995 | 0.996 | 0.991 | 0.991 |
| 50 | 0.995 | 0.995 | 0.992 | 0.993 | 0.996 | 0.996 | 0.991 | 0.991 |
| 51 | 0.995 | 0.995 | 0.991 | 0.992 | 0.996 | 0.996 | 0.991 | 0.991 |
| 52 | 0.995 | 0.995 | 0.993 | 0.992 | 0.996 | 0.996 | 0.991 | 0.991 |
| 53 | 0.994 | 0.995 | 0.989 | 0.991 | 0.996 | 0.996 | 0.992 | 0.991 |
| 54 | 0.995 | 0.995 | 0.992 | 0.991 | 0.996 | 0.996 | 0.993 | 0.992 |
| 55 | 0.992 | 0.994 | 0.992 | 0.991 | 0.996 | 0.996 | 0.993 | 0.992 |
| 56 | 0.992 | 0.993 | 0.989 | 0.991 | 0.995 | 0.996 | 0.993 | 0.993 |
| 57 | 0.992 | 0.992 | 0.994 | 0.992 | 0.996 | 0.996 | 0.993 | 0.993 |
| 58 | 0.994 | 0.993 | 0.991 | 0.991 | 0.996 | 0.996 | 0.993 | 0.993 |
| 59 | 0.992 | 0.993 | 0.992 | 0.992 | 0.996 | 0.996 | 0.993 | 0.993 |

Supplemental Table 3 Cross\_validation score and its moving average level for PB1 genomic sequences by GBRT, MLP, RFC and SVC.

| (d)nt_n | GBRT  |         | MLP   |         | RFC   |         | SVC   |         |
|---------|-------|---------|-------|---------|-------|---------|-------|---------|
|         | cv_sc | MA3_cv_ | cv_sc | MA3_cv_ | cv_sc | MA3_cv_ | cv_sc | MA3_cv_ |
| um      | ore   | score   | ore   | score   | ore   | score   | ore   | score   |
| 0       | 0.912 | 0.912   | 0.88  | 0.88    | 0.92  | 0.92    | 0.878 | 0.878   |
| 1       | 0.97  | 0.941   | 0.963 | 0.922   | 0.971 | 0.946   | 0.931 | 0.904   |
| 2       | 0.981 | 0.954   | 0.973 | 0.939   | 0.983 | 0.958   | 0.934 | 0.914   |
| 3       | 0.984 | 0.978   | 0.972 | 0.969   | 0.985 | 0.98    | 0.935 | 0.933   |
| 4       | 0.984 | 0.983   | 0.976 | 0.974   | 0.988 | 0.985   | 0.939 | 0.936   |
| 5       | 0.985 | 0.984   | 0.976 | 0.975   | 0.989 | 0.987   | 0.939 | 0.938   |
| 6       | 0.985 | 0.985   | 0.971 | 0.974   | 0.989 | 0.988   | 0.962 | 0.947   |
| 7       | 0.987 | 0.985   | 0.973 | 0.973   | 0.99  | 0.989   | 0.965 | 0.955   |
| 8       | 0.989 | 0.987   | 0.98  | 0.974   | 0.992 | 0.99    | 0.975 | 0.967   |
| 9       | 0.994 | 0.99    | 0.987 | 0.98    | 0.993 | 0.992   | 0.984 | 0.975   |
| 10      | 0.994 | 0.992   | 0.98  | 0.982   | 0.995 | 0.993   | 0.982 | 0.98    |
| 11      | 0.995 | 0.994   | 0.989 | 0.985   | 0.994 | 0.994   | 0.987 | 0.984   |
| 12      | 0.994 | 0.995   | 0.988 | 0.986   | 0.994 | 0.995   | 0.987 | 0.985   |
| 13      | 0.995 | 0.995   | 0.99  | 0.989   | 0.994 | 0.994   | 0.988 | 0.987   |
| 14      | 0.995 | 0.995   | 0.99  | 0.989   | 0.995 | 0.994   | 0.988 | 0.988   |



|    |       |       |       |       |       |       |       |       |
|----|-------|-------|-------|-------|-------|-------|-------|-------|
| 15 | 0.995 | 0.995 | 0.99  | 0.99  | 0.995 | 0.994 | 0.988 | 0.988 |
| 16 | 0.995 | 0.995 | 0.991 | 0.99  | 0.995 | 0.995 | 0.988 | 0.988 |
| 17 | 0.995 | 0.995 | 0.99  | 0.99  | 0.995 | 0.995 | 0.988 | 0.988 |
| 18 | 0.996 | 0.995 | 0.99  | 0.99  | 0.995 | 0.995 | 0.987 | 0.988 |
| 19 | 0.996 | 0.995 | 0.99  | 0.99  | 0.995 | 0.995 | 0.988 | 0.988 |
| 20 | 0.995 | 0.995 | 0.989 | 0.99  | 0.995 | 0.995 | 0.988 | 0.988 |
| 21 | 0.995 | 0.995 | 0.99  | 0.99  | 0.994 | 0.995 | 0.989 | 0.988 |
| 22 | 0.995 | 0.995 | 0.992 | 0.99  | 0.995 | 0.995 | 0.989 | 0.989 |
| 23 | 0.996 | 0.995 | 0.992 | 0.991 | 0.994 | 0.995 | 0.988 | 0.989 |
| 24 | 0.995 | 0.995 | 0.994 | 0.993 | 0.995 | 0.995 | 0.988 | 0.988 |
| 25 | 0.996 | 0.996 | 0.996 | 0.994 | 0.995 | 0.995 | 0.988 | 0.988 |
| 26 | 0.995 | 0.996 | 0.993 | 0.994 | 0.995 | 0.995 | 0.988 | 0.988 |
| 27 | 0.996 | 0.996 | 0.995 | 0.995 | 0.994 | 0.995 | 0.988 | 0.988 |
| 28 | 0.996 | 0.996 | 0.995 | 0.994 | 0.994 | 0.995 | 0.99  | 0.989 |
| 29 | 0.996 | 0.996 | 0.993 | 0.995 | 0.996 | 0.995 | 0.99  | 0.989 |
| 30 | 0.996 | 0.996 | 0.994 | 0.994 | 0.995 | 0.995 | 0.99  | 0.99  |
| 31 | 0.996 | 0.996 | 0.995 | 0.994 | 0.996 | 0.995 | 0.99  | 0.99  |
| 32 | 0.996 | 0.996 | 0.995 | 0.995 | 0.995 | 0.995 | 0.99  | 0.99  |
| 33 | 0.996 | 0.996 | 0.996 | 0.995 | 0.996 | 0.995 | 0.99  | 0.99  |
| 34 | 0.996 | 0.996 | 0.992 | 0.994 | 0.995 | 0.995 | 0.99  | 0.99  |
| 35 | 0.996 | 0.996 | 0.996 | 0.995 | 0.995 | 0.995 | 0.99  | 0.99  |
| 36 | 0.996 | 0.996 | 0.993 | 0.994 | 0.995 | 0.995 | 0.99  | 0.99  |
| 37 | 0.996 | 0.996 | 0.994 | 0.994 | 0.996 | 0.995 | 0.99  | 0.99  |
| 38 | 0.996 | 0.996 | 0.996 | 0.994 | 0.996 | 0.995 | 0.99  | 0.99  |
| 39 | 0.996 | 0.996 | 0.99  | 0.993 | 0.995 | 0.995 | 0.99  | 0.99  |
| 40 | 0.996 | 0.996 | 0.993 | 0.993 | 0.995 | 0.995 | 0.99  | 0.99  |
| 41 | 0.996 | 0.996 | 0.994 | 0.992 | 0.995 | 0.995 | 0.99  | 0.99  |
| 42 | 0.996 | 0.996 | 0.994 | 0.994 | 0.995 | 0.995 | 0.991 | 0.99  |
| 43 | 0.996 | 0.996 | 0.995 | 0.995 | 0.996 | 0.995 | 0.991 | 0.99  |
| 44 | 0.997 | 0.996 | 0.993 | 0.994 | 0.996 | 0.996 | 0.99  | 0.991 |
| 45 | 0.997 | 0.996 | 0.995 | 0.995 | 0.996 | 0.996 | 0.99  | 0.991 |
| 46 | 0.996 | 0.997 | 0.995 | 0.994 | 0.996 | 0.996 | 0.991 | 0.991 |
| 47 | 0.996 | 0.996 | 0.996 | 0.995 | 0.995 | 0.996 | 0.991 | 0.991 |
| 48 | 0.995 | 0.996 | 0.993 | 0.994 | 0.996 | 0.996 | 0.991 | 0.991 |
| 49 | 0.995 | 0.996 | 0.996 | 0.995 | 0.996 | 0.996 | 0.991 | 0.991 |
| 50 | 0.995 | 0.995 | 0.993 | 0.994 | 0.995 | 0.996 | 0.991 | 0.991 |
| 51 | 0.996 | 0.996 | 0.994 | 0.994 | 0.996 | 0.996 | 0.991 | 0.991 |
| 52 | 0.996 | 0.996 | 0.995 | 0.994 | 0.996 | 0.996 | 0.991 | 0.991 |
| 53 | 0.996 | 0.996 | 0.992 | 0.994 | 0.995 | 0.996 | 0.991 | 0.991 |
| 54 | 0.996 | 0.996 | 0.995 | 0.994 | 0.996 | 0.996 | 0.992 | 0.991 |
| 55 | 0.996 | 0.996 | 0.993 | 0.993 | 0.996 | 0.996 | 0.992 | 0.992 |
| 56 | 0.995 | 0.996 | 0.996 | 0.994 | 0.996 | 0.996 | 0.992 | 0.992 |
| 57 | 0.996 | 0.996 | 0.992 | 0.994 | 0.996 | 0.996 | 0.992 | 0.992 |
| 58 | 0.995 | 0.995 | 0.993 | 0.994 | 0.996 | 0.996 | 0.992 | 0.992 |

|    |       |       |       |       |       |       |       |       |
|----|-------|-------|-------|-------|-------|-------|-------|-------|
| 59 | 0.996 | 0.996 | 0.996 | 0.994 | 0.996 | 0.996 | 0.992 | 0.992 |
|----|-------|-------|-------|-------|-------|-------|-------|-------|

\* PB1, mlp,cv\_score,rolling, amended value = 10

Supplemental Table 4 Cross\_validation score and its moving average level for PA genomic sequences by GBRT, MLP, RFC and SVC.

| (d)nt_n<br>um | GBRT         |                  | MLP          |                  | RFC          |                  | SVC          |                  |
|---------------|--------------|------------------|--------------|------------------|--------------|------------------|--------------|------------------|
|               | cv_sc<br>ore | MA3_cv_<br>score | cv_sc<br>ore | MA3_cv_<br>score | cv_sc<br>ore | MA3_cv_<br>score | cv_sc<br>ore | MA3_cv_<br>score |
| 0             | 0.972        | 0.972            | 0.972        | 0.972            | 0.972        | 0.972            | 0.573        | 0.573            |
| 1             | 0.974        | 0.973            | 0.978        | 0.975            | 0.975        | 0.973            | 0.573        | 0.573            |
| 2             | 0.989        | 0.979            | 0.957        | 0.969            | 0.987        | 0.978            | 0.787        | 0.644            |
| 3             | 0.99         | 0.984            | 0.937        | 0.957            | 0.989        | 0.984            | 0.854        | 0.738            |
| 4             | 0.989        | 0.989            | 0.963        | 0.952            | 0.989        | 0.989            | 0.855        | 0.832            |
| 5             | 0.987        | 0.989            | 0.94         | 0.947            | 0.99         | 0.989            | 0.843        | 0.851            |
| 6             | 0.987        | 0.988            | 0.939        | 0.947            | 0.99         | 0.99             | 0.865        | 0.854            |
| 7             | 0.988        | 0.987            | 0.96         | 0.946            | 0.991        | 0.99             | 0.933        | 0.88             |
| 8             | 0.987        | 0.988            | 0.963        | 0.954            | 0.99         | 0.99             | 0.934        | 0.91             |
| 9             | 0.99         | 0.989            | 0.966        | 0.963            | 0.992        | 0.991            | 0.929        | 0.932            |
| 10            | 0.988        | 0.989            | 0.966        | 0.965            | 0.991        | 0.991            | 0.95         | 0.938            |
| 11            | 0.988        | 0.989            | 0.963        | 0.965            | 0.991        | 0.991            | 0.942        | 0.94             |
| 12            | 0.989        | 0.989            | 0.974        | 0.968            | 0.992        | 0.991            | 0.941        | 0.945            |
| 13            | 0.991        | 0.989            | 0.983        | 0.973            | 0.992        | 0.992            | 0.96         | 0.948            |
| 14            | 0.993        | 0.991            | 0.984        | 0.98             | 0.993        | 0.993            | 0.96         | 0.954            |
| 15            | 0.992        | 0.992            | 0.978        | 0.981            | 0.992        | 0.993            | 0.96         | 0.96             |
| 16            | 0.993        | 0.992            | 0.978        | 0.98             | 0.993        | 0.993            | 0.96         | 0.96             |
| 17            | 0.993        | 0.993            | 0.981        | 0.979            | 0.993        | 0.993            | 0.967        | 0.962            |
| 18            | 0.992        | 0.993            | 0.988        | 0.982            | 0.993        | 0.993            | 0.971        | 0.966            |
| 19            | 0.993        | 0.993            | 0.985        | 0.984            | 0.993        | 0.993            | 0.972        | 0.97             |
| 20            | 0.993        | 0.993            | 0.987        | 0.987            | 0.993        | 0.993            | 0.978        | 0.974            |
| 21            | 0.994        | 0.993            | 0.983        | 0.985            | 0.994        | 0.993            | 0.978        | 0.976            |
| 22            | 0.994        | 0.994            | 0.986        | 0.985            | 0.993        | 0.993            | 0.98         | 0.979            |
| 23            | 0.994        | 0.994            | 0.988        | 0.986            | 0.994        | 0.994            | 0.981        | 0.98             |
| 24            | 0.993        | 0.994            | 0.985        | 0.987            | 0.993        | 0.994            | 0.98         | 0.98             |
| 25            | 0.992        | 0.993            | 0.988        | 0.987            | 0.994        | 0.994            | 0.978        | 0.98             |
| 26            | 0.994        | 0.993            | 0.978        | 0.984            | 0.994        | 0.994            | 0.976        | 0.978            |
| 27            | 0.993        | 0.993            | 0.984        | 0.984            | 0.994        | 0.994            | 0.977        | 0.977            |
| 28            | 0.992        | 0.993            | 0.986        | 0.983            | 0.994        | 0.994            | 0.977        | 0.977            |
| 29            | 0.993        | 0.993            | 0.983        | 0.984            | 0.994        | 0.994            | 0.979        | 0.977            |
| 30            | 0.992        | 0.992            | 0.995        | 0.988            | 0.994        | 0.994            | 0.987        | 0.981            |
| 31            | 0.992        | 0.992            | 0.991        | 0.99             | 0.994        | 0.994            | 0.987        | 0.984            |
| 32            | 0.992        | 0.992            | 0.993        | 0.993            | 0.994        | 0.994            | 0.987        | 0.987            |
| 33            | 0.993        | 0.992            | 0.994        | 0.993            | 0.994        | 0.994            | 0.989        | 0.988            |
| 34            | 0.992        | 0.992            | 0.994        | 0.994            | 0.993        | 0.994            | 0.989        | 0.988            |
| 35            | 0.992        | 0.993            | 0.988        | 0.992            | 0.994        | 0.994            | 0.99         | 0.989            |

|    |       |       |       |       |       |       |       |       |
|----|-------|-------|-------|-------|-------|-------|-------|-------|
| 36 | 0.992 | 0.992 | 0.995 | 0.992 | 0.994 | 0.994 | 0.99  | 0.989 |
| 37 | 0.992 | 0.992 | 0.989 | 0.991 | 0.994 | 0.994 | 0.991 | 0.99  |
| 38 | 0.992 | 0.992 | 0.994 | 0.993 | 0.994 | 0.994 | 0.991 | 0.991 |
| 39 | 0.992 | 0.992 | 0.992 | 0.991 | 0.994 | 0.994 | 0.991 | 0.991 |
| 40 | 0.992 | 0.992 | 0.994 | 0.993 | 0.994 | 0.994 | 0.991 | 0.991 |
| 41 | 0.992 | 0.992 | 0.994 | 0.993 | 0.994 | 0.994 | 0.991 | 0.991 |
| 42 | 0.992 | 0.992 | 0.994 | 0.994 | 0.994 | 0.994 | 0.993 | 0.992 |
| 43 | 0.991 | 0.992 | 0.991 | 0.993 | 0.994 | 0.994 | 0.993 | 0.992 |
| 44 | 0.991 | 0.991 | 0.995 | 0.993 | 0.994 | 0.994 | 0.993 | 0.993 |
| 45 | 0.992 | 0.992 | 0.994 | 0.993 | 0.994 | 0.994 | 0.992 | 0.993 |
| 46 | 0.991 | 0.992 | 0.993 | 0.994 | 0.994 | 0.994 | 0.993 | 0.993 |
| 47 | 0.992 | 0.992 | 0.994 | 0.994 | 0.995 | 0.995 | 0.993 | 0.993 |
| 48 | 0.991 | 0.991 | 0.994 | 0.994 | 0.994 | 0.994 | 0.993 | 0.993 |
| 49 | 0.99  | 0.991 | 0.994 | 0.994 | 0.994 | 0.994 | 0.993 | 0.993 |
| 50 | 0.99  | 0.991 | 0.993 | 0.994 | 0.994 | 0.994 | 0.993 | 0.993 |
| 51 | 0.991 | 0.991 | 0.995 | 0.994 | 0.994 | 0.994 | 0.993 | 0.993 |
| 52 | 0.992 | 0.991 | 0.995 | 0.994 | 0.994 | 0.994 | 0.993 | 0.993 |
| 53 | 0.992 | 0.992 | 0.993 | 0.994 | 0.994 | 0.994 | 0.993 | 0.993 |
| 54 | 0.992 | 0.992 | 0.992 | 0.993 | 0.994 | 0.994 | 0.993 | 0.993 |
| 55 | 0.991 | 0.992 | 0.995 | 0.993 | 0.994 | 0.994 | 0.993 | 0.993 |
| 56 | 0.991 | 0.991 | 0.995 | 0.994 | 0.994 | 0.994 | 0.993 | 0.993 |
| 57 | 0.992 | 0.991 | 0.993 | 0.994 | 0.994 | 0.994 | 0.993 | 0.993 |
| 58 | 0.992 | 0.991 | 0.994 | 0.994 | 0.994 | 0.994 | 0.994 | 0.993 |
| 59 | 0.992 | 0.992 | 0.996 | 0.994 | 0.995 | 0.994 | 0.994 | 0.994 |

Supplemental Table 5 Cross\_validation score and its moving average level for HA genomic sequences by GBRT, MLP, RFC and SVC.

| (d)nt_n | GBRT  |         | MLP   |         | RFC   |         | SVC   |         |
|---------|-------|---------|-------|---------|-------|---------|-------|---------|
|         | cv_sc | MA3_cv_ | cv_sc | MA3_cv_ | cv_sc | MA3_cv_ | cv_sc | MA3_cv_ |
| um      | ore   | score   | ore   | score   | ore   | score   | ore   | score   |
| 0       | 0.785 | 0.785   | 0.647 | 0.647   | 0.895 | 0.895   | 0.696 | 0.696   |
| 1       | 0.881 | 0.833   | 0.827 | 0.737   | 0.935 | 0.915   | 0.800 | 0.748   |
| 2       | 0.960 | 0.875   | 0.871 | 0.781   | 0.976 | 0.936   | 0.814 | 0.770   |
| 3       | 0.965 | 0.936   | 0.888 | 0.862   | 0.980 | 0.964   | 0.840 | 0.818   |
| 4       | 0.979 | 0.968   | 0.931 | 0.897   | 0.987 | 0.981   | 0.835 | 0.829   |
| 5       | 0.987 | 0.977   | 0.953 | 0.924   | 0.993 | 0.987   | 0.898 | 0.858   |
| 6       | 0.991 | 0.986   | 0.962 | 0.949   | 0.994 | 0.991   | 0.906 | 0.880   |
| 7       | 0.993 | 0.990   | 0.962 | 0.959   | 0.995 | 0.994   | 0.917 | 0.907   |
| 8       | 0.994 | 0.993   | 0.964 | 0.963   | 0.995 | 0.995   | 0.916 | 0.913   |
| 9       | 0.994 | 0.994   | 0.979 | 0.968   | 0.995 | 0.995   | 0.918 | 0.917   |
| 10      | 0.995 | 0.994   | 0.980 | 0.974   | 0.995 | 0.995   | 0.918 | 0.917   |
| 11      | 0.995 | 0.995   | 0.982 | 0.980   | 0.996 | 0.995   | 0.943 | 0.926   |
| 12      | 0.993 | 0.994   | 0.985 | 0.982   | 0.996 | 0.995   | 0.961 | 0.941   |
| 13      | 0.993 | 0.994   | 0.986 | 0.984   | 0.997 | 0.996   | 0.968 | 0.957   |

|    |       |       |       |       |       |       |       |       |
|----|-------|-------|-------|-------|-------|-------|-------|-------|
| 14 | 0.993 | 0.993 | 0.985 | 0.985 | 0.996 | 0.996 | 0.968 | 0.966 |
| 15 | 0.992 | 0.993 | 0.989 | 0.987 | 0.996 | 0.996 | 0.970 | 0.969 |
| 16 | 0.995 | 0.993 | 0.992 | 0.989 | 0.996 | 0.996 | 0.976 | 0.971 |
| 17 | 0.995 | 0.994 | 0.993 | 0.992 | 0.996 | 0.996 | 0.978 | 0.975 |
| 18 | 0.995 | 0.995 | 0.989 | 0.991 | 0.996 | 0.996 | 0.978 | 0.978 |
| 19 | 0.994 | 0.995 | 0.992 | 0.991 | 0.997 | 0.996 | 0.979 | 0.978 |
| 20 | 0.995 | 0.995 | 0.992 | 0.991 | 0.997 | 0.997 | 0.981 | 0.979 |
| 21 | 0.995 | 0.995 | 0.990 | 0.991 | 0.997 | 0.997 | 0.982 | 0.981 |
| 22 | 0.995 | 0.995 | 0.993 | 0.992 | 0.997 | 0.997 | 0.981 | 0.982 |
| 23 | 0.995 | 0.995 | 0.993 | 0.992 | 0.997 | 0.997 | 0.982 | 0.982 |
| 24 | 0.995 | 0.995 | 0.994 | 0.994 | 0.997 | 0.997 | 0.984 | 0.983 |
| 25 | 0.992 | 0.994 | 0.994 | 0.994 | 0.997 | 0.997 | 0.984 | 0.983 |
| 26 | 0.996 | 0.994 | 0.993 | 0.994 | 0.997 | 0.997 | 0.984 | 0.984 |
| 27 | 0.995 | 0.994 | 0.993 | 0.993 | 0.997 | 0.997 | 0.986 | 0.985 |
| 28 | 0.995 | 0.995 | 0.993 | 0.993 | 0.997 | 0.997 | 0.986 | 0.985 |
| 29 | 0.995 | 0.995 | 0.988 | 0.991 | 0.997 | 0.997 | 0.986 | 0.986 |
| 30 | 0.996 | 0.995 | 0.993 | 0.991 | 0.997 | 0.997 | 0.988 | 0.987 |
| 31 | 0.996 | 0.996 | 0.993 | 0.991 | 0.997 | 0.997 | 0.988 | 0.987 |
| 32 | 0.996 | 0.996 | 0.994 | 0.993 | 0.997 | 0.997 | 0.989 | 0.988 |
| 33 | 0.996 | 0.996 | 0.994 | 0.994 | 0.997 | 0.997 | 0.989 | 0.989 |
| 34 | 0.996 | 0.996 | 0.990 | 0.993 | 0.996 | 0.997 | 0.989 | 0.989 |
| 35 | 0.996 | 0.996 | 0.994 | 0.993 | 0.997 | 0.997 | 0.990 | 0.990 |
| 36 | 0.997 | 0.996 | 0.993 | 0.992 | 0.997 | 0.997 | 0.992 | 0.990 |
| 37 | 0.996 | 0.996 | 0.995 | 0.994 | 0.997 | 0.997 | 0.992 | 0.991 |
| 38 | 0.997 | 0.997 | 0.996 | 0.995 | 0.997 | 0.997 | 0.993 | 0.992 |
| 39 | 0.997 | 0.997 | 0.996 | 0.996 | 0.997 | 0.997 | 0.993 | 0.992 |
| 40 | 0.997 | 0.997 | 0.994 | 0.995 | 0.997 | 0.997 | 0.993 | 0.993 |
| 41 | 0.997 | 0.997 | 0.994 | 0.995 | 0.997 | 0.997 | 0.993 | 0.993 |
| 42 | 0.997 | 0.997 | 0.995 | 0.994 | 0.996 | 0.997 | 0.993 | 0.993 |
| 43 | 0.997 | 0.997 | 0.995 | 0.994 | 0.997 | 0.997 | 0.994 | 0.993 |
| 44 | 0.997 | 0.997 | 0.994 | 0.995 | 0.997 | 0.997 | 0.993 | 0.993 |
| 45 | 0.997 | 0.997 | 0.995 | 0.994 | 0.997 | 0.997 | 0.993 | 0.993 |
| 46 | 0.996 | 0.997 | 0.994 | 0.994 | 0.997 | 0.997 | 0.993 | 0.993 |
| 47 | 0.996 | 0.996 | 0.996 | 0.995 | 0.997 | 0.997 | 0.993 | 0.993 |
| 48 | 0.997 | 0.996 | 0.995 | 0.995 | 0.997 | 0.997 | 0.993 | 0.993 |
| 49 | 0.997 | 0.997 | 0.996 | 0.996 | 0.997 | 0.997 | 0.993 | 0.993 |
| 50 | 0.996 | 0.997 | 0.994 | 0.995 | 0.997 | 0.997 | 0.993 | 0.993 |
| 51 | 0.997 | 0.997 | 0.996 | 0.995 | 0.997 | 0.997 | 0.993 | 0.993 |
| 52 | 0.996 | 0.996 | 0.994 | 0.995 | 0.997 | 0.997 | 0.993 | 0.993 |
| 53 | 0.996 | 0.996 | 0.995 | 0.995 | 0.997 | 0.997 | 0.993 | 0.993 |
| 54 | 0.997 | 0.996 | 0.995 | 0.995 | 0.997 | 0.997 | 0.994 | 0.994 |
| 55 | 0.997 | 0.997 | 0.996 | 0.995 | 0.997 | 0.997 | 0.994 | 0.994 |
| 56 | 0.997 | 0.997 | 0.996 | 0.996 | 0.997 | 0.997 | 0.994 | 0.994 |
| 57 | 0.997 | 0.997 | 0.995 | 0.996 | 0.997 | 0.997 | 0.994 | 0.994 |

|    |       |       |       |       |       |       |       |       |
|----|-------|-------|-------|-------|-------|-------|-------|-------|
| 58 | 0.996 | 0.996 | 0.995 | 0.995 | 0.997 | 0.997 | 0.994 | 0.994 |
| 59 | 0.997 | 0.996 | 0.996 | 0.995 | 0.997 | 0.997 | 0.994 | 0.994 |

Supplemental Table 6 Cross\_validation score and its moving average level for NP genomic sequences by GBRT, MLP, RFC and SVC.

| (d)nt_n<br>um | GBRT         |                  | MLP          |                  | RFC          |                  | SVC          |                  |
|---------------|--------------|------------------|--------------|------------------|--------------|------------------|--------------|------------------|
|               | cv_sc<br>ore | MA3_cv_<br>score | cv_sc<br>ore | MA3_cv_<br>score | cv_sc<br>ore | MA3_cv_<br>score | cv_sc<br>ore | MA3_cv_<br>score |
| 0             | 0.737        | 0.737            | 0.668        | 0.668            | 0.822        | 0.822            | 0.657        | 0.657            |
| 1             | 0.916        | 0.827            | 0.829        | 0.749            | 0.952        | 0.887            | 0.664        | 0.661            |
| 2             | 0.938        | 0.864            | 0.794        | 0.764            | 0.966        | 0.913            | 0.673        | 0.665            |
| 3             | 0.974        | 0.942            | 0.921        | 0.848            | 0.977        | 0.965            | 0.616        | 0.651            |
| 4             | 0.991        | 0.968            | 0.967        | 0.894            | 0.993        | 0.979            | 0.859        | 0.716            |
| 5             | 0.994        | 0.986            | 0.972        | 0.954            | 0.995        | 0.988            | 0.962        | 0.812            |
| 6             | 0.995        | 0.993            | 0.982        | 0.974            | 0.995        | 0.994            | 0.982        | 0.934            |
| 7             | 0.995        | 0.995            | 0.993        | 0.982            | 0.995        | 0.995            | 0.994        | 0.979            |
| 8             | 0.994        | 0.994            | 0.993        | 0.989            | 0.995        | 0.995            | 0.994        | 0.99             |
| 9             | 0.993        | 0.994            | 0.994        | 0.993            | 0.995        | 0.995            | 0.995        | 0.994            |
| 10            | 0.993        | 0.993            | 0.994        | 0.994            | 0.995        | 0.995            | 0.995        | 0.995            |
| 11            | 0.994        | 0.993            | 0.994        | 0.994            | 0.995        | 0.995            | 0.995        | 0.995            |
| 12            | 0.994        | 0.994            | 0.994        | 0.994            | 0.995        | 0.995            | 0.995        | 0.995            |
| 13            | 0.994        | 0.994            | 0.994        | 0.994            | 0.995        | 0.995            | 0.995        | 0.995            |
| 14            | 0.995        | 0.995            | 0.994        | 0.994            | 0.996        | 0.995            | 0.995        | 0.995            |
| 15            | 0.995        | 0.995            | 0.994        | 0.994            | 0.996        | 0.996            | 0.995        | 0.995            |
| 16            | 0.994        | 0.995            | 0.994        | 0.994            | 0.995        | 0.995            | 0.995        | 0.995            |
| 17            | 0.994        | 0.994            | 0.993        | 0.994            | 0.996        | 0.995            | 0.995        | 0.995            |
| 18            | 0.994        | 0.994            | 0.994        | 0.994            | 0.996        | 0.996            | 0.995        | 0.995            |
| 19            | 0.994        | 0.994            | 0.994        | 0.994            | 0.996        | 0.996            | 0.996        | 0.995            |
| 20            | 0.994        | 0.994            | 0.994        | 0.994            | 0.996        | 0.996            | 0.996        | 0.995            |
| 21            | 0.994        | 0.994            | 0.993        | 0.994            | 0.996        | 0.996            | 0.996        | 0.996            |
| 22            | 0.994        | 0.994            | 0.993        | 0.993            | 0.996        | 0.996            | 0.996        | 0.996            |
| 23            | 0.993        | 0.994            | 0.992        | 0.993            | 0.996        | 0.996            | 0.996        | 0.996            |
| 24            | 0.994        | 0.994            | 0.994        | 0.993            | 0.996        | 0.996            | 0.996        | 0.996            |
| 25            | 0.994        | 0.994            | 0.994        | 0.994            | 0.996        | 0.996            | 0.995        | 0.996            |
| 26            | 0.994        | 0.994            | 0.993        | 0.994            | 0.995        | 0.996            | 0.996        | 0.996            |
| 27            | 0.994        | 0.994            | 0.993        | 0.994            | 0.996        | 0.996            | 0.996        | 0.996            |
| 28            | 0.994        | 0.994            | 0.994        | 0.994            | 0.995        | 0.995            | 0.996        | 0.996            |
| 29            | 0.993        | 0.994            | 0.995        | 0.994            | 0.996        | 0.996            | 0.996        | 0.996            |
| 30            | 0.994        | 0.994            | 0.994        | 0.994            | 0.995        | 0.995            | 0.996        | 0.996            |
| 31            | 0.993        | 0.994            | 0.995        | 0.994            | 0.996        | 0.996            | 0.996        | 0.996            |
| 32            | 0.993        | 0.994            | 0.994        | 0.994            | 0.995        | 0.995            | 0.996        | 0.996            |
| 33            | 0.994        | 0.994            | 0.994        | 0.994            | 0.995        | 0.995            | 0.996        | 0.996            |
| 34            | 0.994        | 0.994            | 0.995        | 0.994            | 0.995        | 0.995            | 0.995        | 0.996            |
| 35            | 0.993        | 0.994            | 0.994        | 0.994            | 0.996        | 0.995            | 0.995        | 0.995            |

|    |       |       |       |       |       |       |       |       |
|----|-------|-------|-------|-------|-------|-------|-------|-------|
| 36 | 0.994 | 0.994 | 0.995 | 0.994 | 0.996 | 0.995 | 0.996 | 0.996 |
| 37 | 0.993 | 0.994 | 0.994 | 0.994 | 0.996 | 0.996 | 0.996 | 0.996 |
| 38 | 0.993 | 0.994 | 0.995 | 0.995 | 0.995 | 0.996 | 0.996 | 0.996 |
| 39 | 0.994 | 0.993 | 0.994 | 0.994 | 0.996 | 0.996 | 0.996 | 0.996 |
| 40 | 0.994 | 0.994 | 0.995 | 0.994 | 0.995 | 0.995 | 0.996 | 0.996 |
| 41 | 0.994 | 0.994 | 0.995 | 0.994 | 0.995 | 0.995 | 0.996 | 0.996 |
| 42 | 0.994 | 0.994 | 0.994 | 0.994 | 0.995 | 0.995 | 0.996 | 0.996 |
| 43 | 0.993 | 0.993 | 0.995 | 0.994 | 0.996 | 0.995 | 0.996 | 0.996 |
| 44 | 0.993 | 0.993 | 0.994 | 0.994 | 0.995 | 0.995 | 0.996 | 0.996 |
| 45 | 0.994 | 0.993 | 0.994 | 0.994 | 0.996 | 0.996 | 0.996 | 0.996 |
| 46 | 0.992 | 0.993 | 0.994 | 0.994 | 0.996 | 0.995 | 0.996 | 0.996 |
| 47 | 0.994 | 0.993 | 0.993 | 0.994 | 0.995 | 0.995 | 0.996 | 0.996 |
| 48 | 0.994 | 0.993 | 0.994 | 0.994 | 0.995 | 0.995 | 0.996 | 0.996 |
| 49 | 0.994 | 0.994 | 0.994 | 0.994 | 0.995 | 0.995 | 0.996 | 0.996 |
| 50 | 0.994 | 0.994 | 0.994 | 0.994 | 0.996 | 0.995 | 0.996 | 0.996 |
| 51 | 0.994 | 0.994 | 0.995 | 0.994 | 0.995 | 0.995 | 0.996 | 0.996 |
| 52 | 0.993 | 0.994 | 0.993 | 0.994 | 0.994 | 0.995 | 0.996 | 0.996 |
| 53 | 0.995 | 0.994 | 0.993 | 0.994 | 0.995 | 0.995 | 0.996 | 0.996 |
| 54 | 0.994 | 0.994 | 0.995 | 0.994 | 0.995 | 0.995 | 0.996 | 0.996 |
| 55 | 0.995 | 0.995 | 0.995 | 0.994 | 0.996 | 0.995 | 0.996 | 0.996 |
| 56 | 0.994 | 0.994 | 0.996 | 0.995 | 0.996 | 0.995 | 0.996 | 0.996 |
| 57 | 0.995 | 0.995 | 0.994 | 0.995 | 0.995 | 0.995 | 0.996 | 0.996 |
| 58 | 0.994 | 0.994 | 0.994 | 0.995 | 0.995 | 0.995 | 0.996 | 0.996 |
| 59 | 0.995 | 0.995 | 0.995 | 0.994 | 0.995 | 0.995 | 0.996 | 0.996 |

Supplemental Table 7 Cross\_validation score and its moving average level for NA genomic sequences by GBRT, MLP, RFC and SVC.

| (d)nt_n | GBRT  |         | MLP   |         | RFC   |         | SVC   |         |
|---------|-------|---------|-------|---------|-------|---------|-------|---------|
|         | cv_sc | MA3_cv_ | cv_sc | MA3_cv_ | cv_sc | MA3_cv_ | cv_sc | MA3_cv_ |
| um      | ore   | score   | ore   | score   | ore   | score   | ore   | score   |
| 0       | 0.93  | 0.93    | 0.909 | 0.909   | 0.943 | 0.943   | 0.905 | 0.905   |
| 1       | 0.954 | 0.942   | 0.939 | 0.924   | 0.962 | 0.953   | 0.912 | 0.908   |
| 2       | 0.984 | 0.956   | 0.976 | 0.941   | 0.986 | 0.964   | 0.973 | 0.93    |
| 3       | 0.987 | 0.975   | 0.978 | 0.964   | 0.987 | 0.979   | 0.973 | 0.953   |
| 4       | 0.987 | 0.986   | 0.978 | 0.978   | 0.988 | 0.987   | 0.978 | 0.975   |
| 5       | 0.992 | 0.989   | 0.988 | 0.981   | 0.993 | 0.99    | 0.988 | 0.98    |
| 6       | 0.993 | 0.991   | 0.989 | 0.985   | 0.994 | 0.992   | 0.989 | 0.985   |
| 7       | 0.993 | 0.993   | 0.989 | 0.989   | 0.994 | 0.994   | 0.989 | 0.988   |
| 8       | 0.993 | 0.993   | 0.989 | 0.989   | 0.994 | 0.994   | 0.989 | 0.989   |
| 9       | 0.993 | 0.993   | 0.988 | 0.989   | 0.994 | 0.994   | 0.988 | 0.989   |
| 10      | 0.993 | 0.993   | 0.987 | 0.988   | 0.994 | 0.994   | 0.989 | 0.989   |
| 11      | 0.994 | 0.993   | 0.988 | 0.988   | 0.995 | 0.994   | 0.989 | 0.989   |
| 12      | 0.994 | 0.994   | 0.991 | 0.989   | 0.995 | 0.995   | 0.991 | 0.99    |
| 13      | 0.994 | 0.994   | 0.99  | 0.99    | 0.994 | 0.995   | 0.991 | 0.99    |

|    |       |       |       |       |       |       |       |       |
|----|-------|-------|-------|-------|-------|-------|-------|-------|
| 14 | 0.994 | 0.994 | 0.991 | 0.991 | 0.995 | 0.995 | 0.991 | 0.991 |
| 15 | 0.995 | 0.994 | 0.992 | 0.991 | 0.995 | 0.995 | 0.994 | 0.992 |
| 16 | 0.994 | 0.994 | 0.993 | 0.992 | 0.995 | 0.995 | 0.994 | 0.993 |
| 17 | 0.994 | 0.994 | 0.993 | 0.993 | 0.995 | 0.995 | 0.994 | 0.994 |
| 18 | 0.994 | 0.994 | 0.99  | 0.992 | 0.995 | 0.995 | 0.994 | 0.994 |
| 19 | 0.994 | 0.994 | 0.991 | 0.991 | 0.995 | 0.995 | 0.994 | 0.994 |
| 20 | 0.994 | 0.994 | 0.992 | 0.991 | 0.995 | 0.995 | 0.994 | 0.994 |
| 21 | 0.994 | 0.994 | 0.994 | 0.992 | 0.995 | 0.995 | 0.994 | 0.994 |
| 22 | 0.994 | 0.994 | 0.992 | 0.992 | 0.995 | 0.995 | 0.995 | 0.994 |
| 23 | 0.995 | 0.994 | 0.994 | 0.993 | 0.996 | 0.995 | 0.995 | 0.995 |
| 24 | 0.994 | 0.994 | 0.993 | 0.993 | 0.995 | 0.995 | 0.995 | 0.995 |
| 25 | 0.994 | 0.994 | 0.994 | 0.994 | 0.995 | 0.996 | 0.995 | 0.995 |
| 26 | 0.994 | 0.994 | 0.994 | 0.994 | 0.996 | 0.996 | 0.995 | 0.995 |
| 27 | 0.993 | 0.994 | 0.993 | 0.994 | 0.996 | 0.996 | 0.995 | 0.995 |
| 28 | 0.994 | 0.994 | 0.994 | 0.994 | 0.996 | 0.996 | 0.995 | 0.995 |
| 29 | 0.994 | 0.994 | 0.994 | 0.994 | 0.995 | 0.996 | 0.995 | 0.995 |
| 30 | 0.994 | 0.994 | 0.995 | 0.994 | 0.995 | 0.995 | 0.995 | 0.995 |
| 31 | 0.994 | 0.994 | 0.992 | 0.993 | 0.995 | 0.995 | 0.995 | 0.995 |
| 32 | 0.995 | 0.994 | 0.995 | 0.994 | 0.996 | 0.995 | 0.995 | 0.995 |
| 33 | 0.994 | 0.994 | 0.994 | 0.994 | 0.995 | 0.995 | 0.995 | 0.995 |
| 34 | 0.994 | 0.994 | 0.994 | 0.994 | 0.996 | 0.995 | 0.995 | 0.995 |
| 35 | 0.994 | 0.994 | 0.995 | 0.995 | 0.995 | 0.995 | 0.995 | 0.995 |
| 36 | 0.993 | 0.994 | 0.994 | 0.994 | 0.996 | 0.996 | 0.995 | 0.995 |
| 37 | 0.995 | 0.994 | 0.994 | 0.994 | 0.996 | 0.996 | 0.995 | 0.995 |
| 38 | 0.994 | 0.994 | 0.993 | 0.994 | 0.995 | 0.996 | 0.995 | 0.995 |
| 39 | 0.994 | 0.994 | 0.992 | 0.993 | 0.995 | 0.996 | 0.995 | 0.995 |
| 40 | 0.994 | 0.994 | 0.993 | 0.993 | 0.995 | 0.995 | 0.995 | 0.995 |
| 41 | 0.993 | 0.994 | 0.993 | 0.992 | 0.995 | 0.995 | 0.995 | 0.995 |
| 42 | 0.994 | 0.993 | 0.994 | 0.993 | 0.996 | 0.995 | 0.995 | 0.995 |
| 43 | 0.994 | 0.994 | 0.993 | 0.993 | 0.996 | 0.996 | 0.995 | 0.995 |
| 44 | 0.995 | 0.994 | 0.991 | 0.993 | 0.996 | 0.996 | 0.995 | 0.995 |
| 45 | 0.994 | 0.994 | 0.994 | 0.993 | 0.996 | 0.996 | 0.995 | 0.995 |
| 46 | 0.994 | 0.994 | 0.994 | 0.993 | 0.995 | 0.995 | 0.995 | 0.995 |
| 47 | 0.995 | 0.994 | 0.993 | 0.994 | 0.996 | 0.996 | 0.995 | 0.995 |
| 48 | 0.995 | 0.995 | 0.994 | 0.994 | 0.997 | 0.996 | 0.995 | 0.995 |
| 49 | 0.995 | 0.995 | 0.993 | 0.993 | 0.996 | 0.996 | 0.995 | 0.995 |
| 50 | 0.995 | 0.995 | 0.994 | 0.993 | 0.995 | 0.996 | 0.995 | 0.995 |
| 51 | 0.995 | 0.995 | 0.991 | 0.993 | 0.996 | 0.995 | 0.995 | 0.995 |
| 52 | 0.995 | 0.995 | 0.993 | 0.993 | 0.995 | 0.995 | 0.995 | 0.995 |
| 53 | 0.995 | 0.995 | 0.993 | 0.992 | 0.995 | 0.996 | 0.995 | 0.995 |
| 54 | 0.995 | 0.995 | 0.994 | 0.993 | 0.996 | 0.996 | 0.995 | 0.995 |
| 55 | 0.995 | 0.995 | 0.99  | 0.992 | 0.996 | 0.996 | 0.995 | 0.995 |
| 56 | 0.994 | 0.995 | 0.991 | 0.992 | 0.997 | 0.996 | 0.995 | 0.995 |
| 57 | 0.995 | 0.995 | 0.991 | 0.991 | 0.996 | 0.996 | 0.995 | 0.995 |

|    |       |       |       |       |       |       |       |       |
|----|-------|-------|-------|-------|-------|-------|-------|-------|
| 58 | 0.995 | 0.995 | 0.993 | 0.992 | 0.996 | 0.996 | 0.995 | 0.995 |
| 59 | 0.995 | 0.995 | 0.992 | 0.992 | 0.996 | 0.996 | 0.995 | 0.995 |

---



## Supplemental Methods

### Supplemental information about Feature Engineering and sequence resampling

#### Supplemental information about Feature Engineering

Feature engineering and feature selection were most important for machine learning analysis. Biologically, there is a species barrier for human and avian influenza viruses, and there should be a linear separability of genotype and phenotype between both groups of viruses. Here, we supposed that the genomic composition of mono- or dinucleotide is associated with the linear separability. In another word, there should be a hyper plane with a margin between avian and human viruses in genomic composition. We supposed that the human/avian-IAV-separability should be consistently linear and make sense biologically. In this context, support vector classifier (SVC) was the best choice. In the case of SVC, data points are viewed as n-dimensional vectors multiply m-number, and it is to separate such points with a hyperplane with maximum-margin. The nonlinear separators, Gradient Boosted Regression Trees (GBRT), Random Forest Classifier (RFC) and Multiple Layer Perception Classifier (MLP), which are based on neural network (MLP) or decision tree (RFC and GBRT), are grown very deep tend to learn highly irregular patterns, at the expense of a small increase in the bias and some loss of interpretability, let alone the biological separability. However, to avoid overfitting, we adjusted the optimized (d)nt number of SVC, via averaging it with the optimized (d)nt number with MLP, RFC and GBRT classifiers.

SVC was the optional model. Thus, SVC was used as main supervised machine learning model for both feature selection and sample classification. SVC was used firstly for (d)nt sorting, secondly for (d)nt optimization, along with principal component analysis (PCA), thirdly as train final classifier with the optimized (d)nts. The (d)nt optimization was performed using four types of machine learning approaches, SVC, GBRT, RFC and MLP. methods.

As Supplementary Figure 3 shown, avian and human sequences were not well classified separately with the 60 (d)nt features. Moreover, as compositional information, the 60 (d)nt features were theoretically not independent of each other, and there was a feature redundancy for the 60 (d)nts. Thus, PCA is used to reduce the dimensionality of batches of (d)nt features before SVC analysis for the feature selection. If there was a higher dependence/correlation between/among a batch of (d)nt features, the AUC score of SVC would be lower post dimensionality reduction of (d)nt features by PCA. In addition, it is time-saving for the calculation of only one PCA value, rather a feature matrix.

Theoretically, to identify every possible dependence of (d)nt features, every possible combination of (d)nt features, with various feature number (a combination of m features from n features,  $2 \leq m \leq 30$ , since combination (60,m)= combination (60,(60-m))), should be utilized for the PCA/SVC feature selection. However, it is a huge job to exhaust all combinations. Here, we selected 2\*combination (60, 2) (3,540) as sampling times for a random sampling of four features from the 60 features for the feature

selection with PCA/SVC. As shown in Supplementary Figure 6, more than 200 times were sampled for each of the 60 features in such process. For each time of PCA/SVC analysis, AUC score was taken as the feature importance value for each of the four sampled features. According to the average ( $n > 200$ ) AUC score, the 60 (d)nt features were sorted.

Finally, SVC, MLP, RFC and GBRT with accumulating (d)nt features were performed again for (d)nt number optimization. The feature list was updated for each round of SVC analysis, with top  $n$  ( $n = n + 1$  for  $n$  in range [1,59]) (d)nt features from the sorted feature list. The 60 AUC score value of the 60 iteration of machine learning analysis were utilized for the final (d)nt number optimization.

### **Supplemental information about sequence resampling**

Resampling was performed via `pandas.DataFrame.sample` (Python) with a float ratio multiplying the segment sequence number, and the final sequence number was an integral number (the Integral function in python is just removing the float, not same as the Rounding function). Thus, 59-61 segment sequence samples were produced for phylogeny and hierarchical clustering analysis, 46, 042 human-adaptive sequences and 46, 488 human-inadaptive avian sequences were produced for feature extraction and model building, with not the same sample number for avian and human sets.

### **Supporting data**

Supporting data includes the sequence ID table, the supporting data for Figures and for supplementary Figures. Supporting data was available online:

[https://github.com/Jamalijama/Predict\\_IAV\\_Host](https://github.com/Jamalijama/Predict_IAV_Host).

### **Code availability**

**The project code available at following website:**

[https://github.com/Jamalijama/Predict\\_IAV\\_Host](https://github.com/Jamalijama/Predict_IAV_Host).

**A**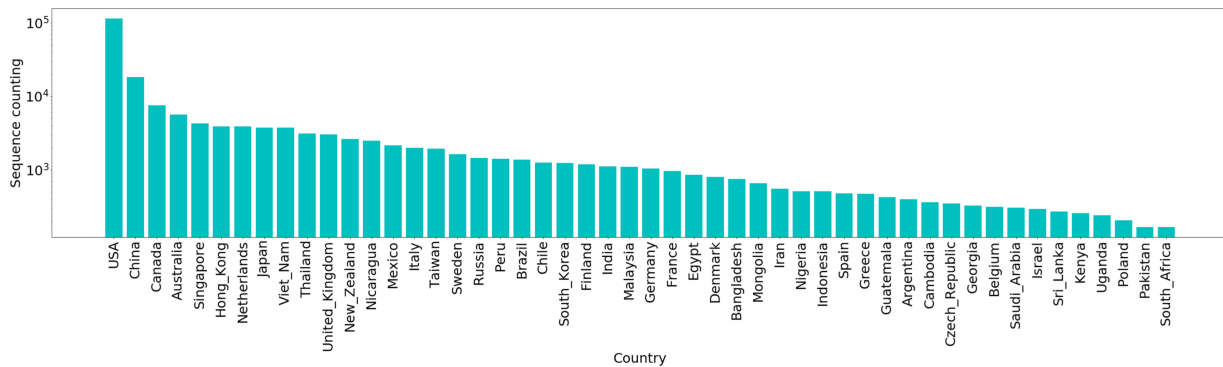**B**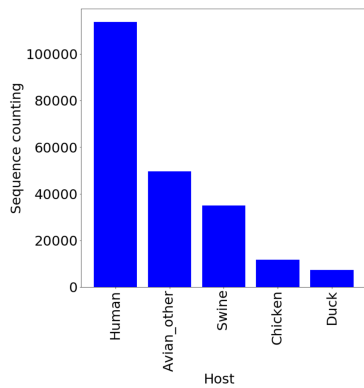**C**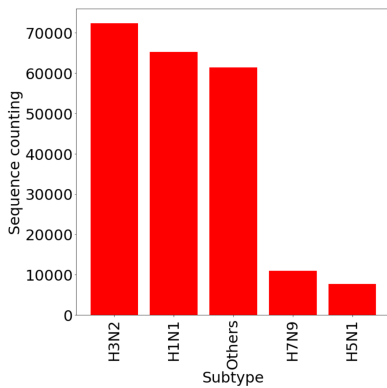**D**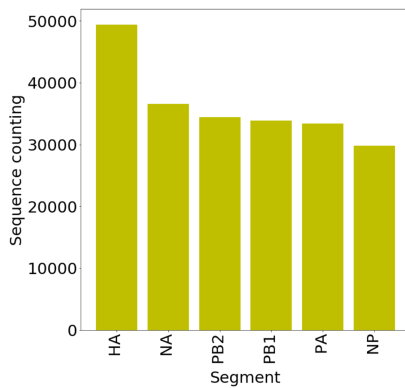**E**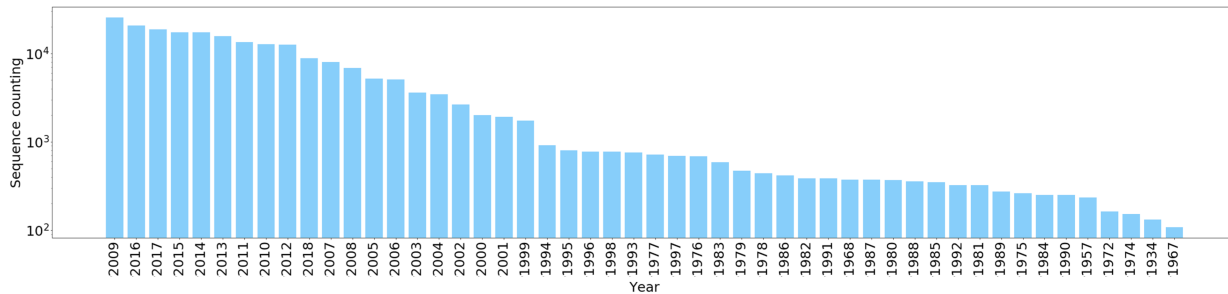

**A**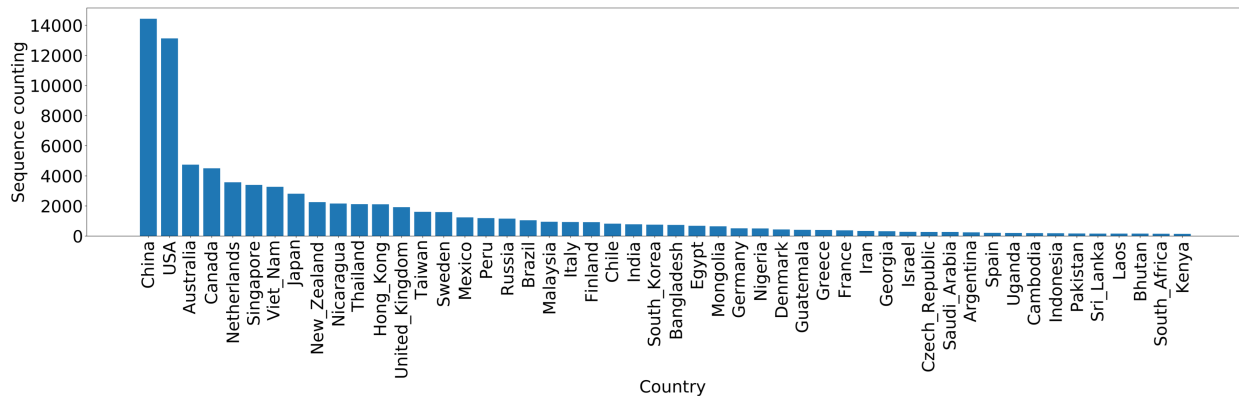**B**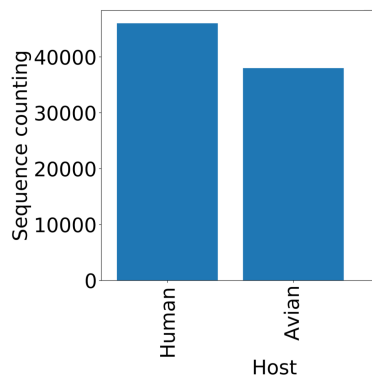**C**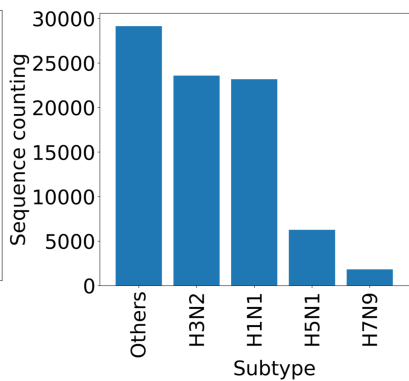**E**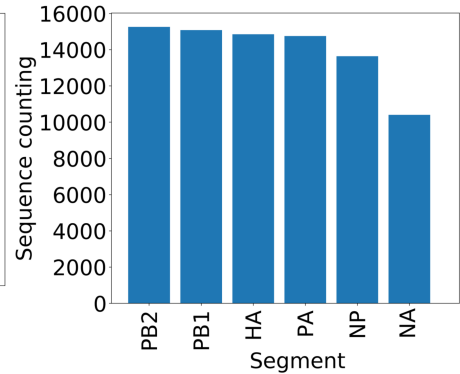**F**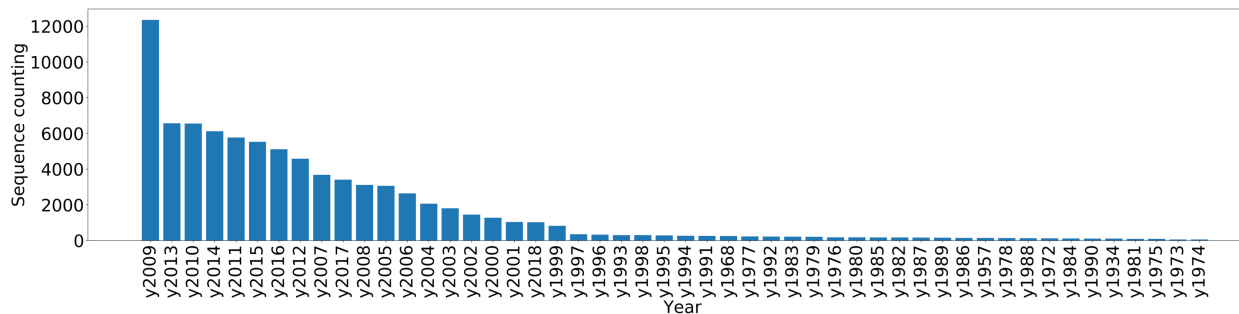

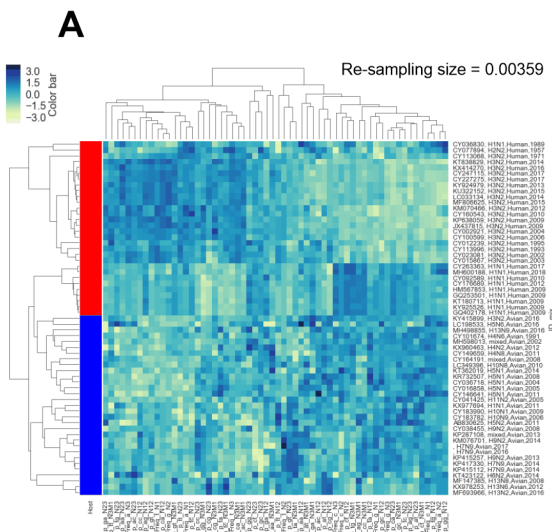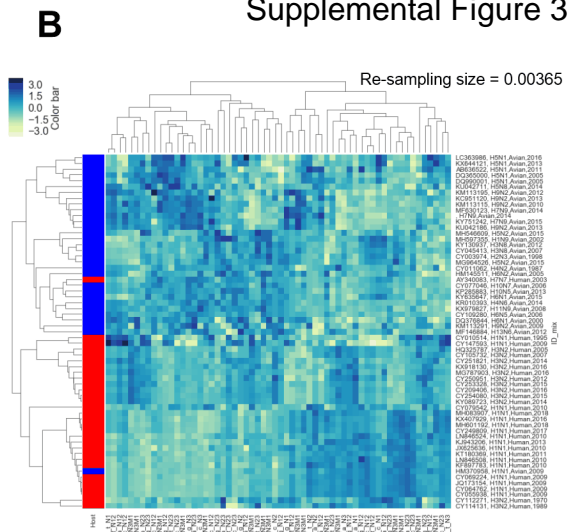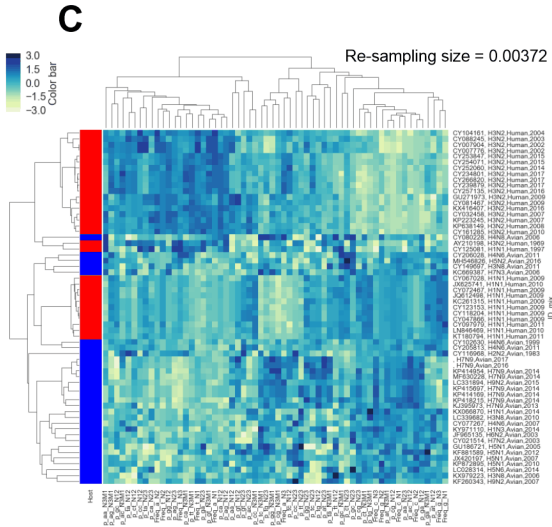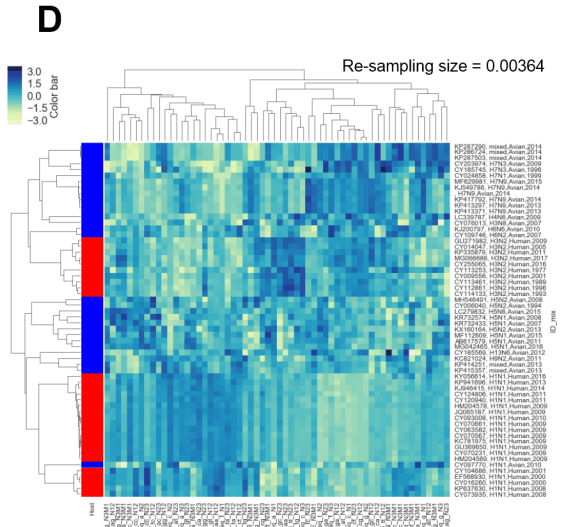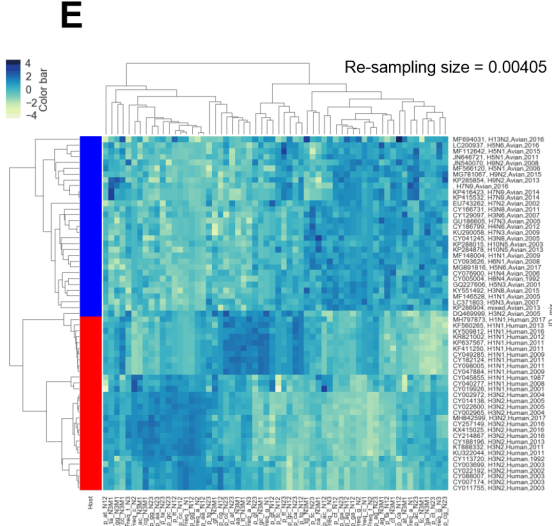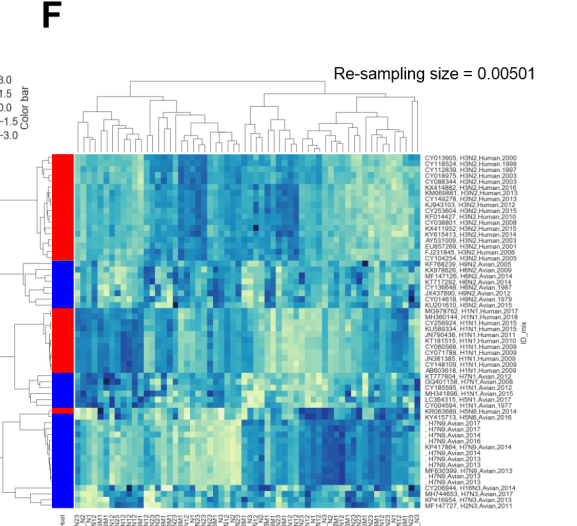

# Supplemental Figure 4

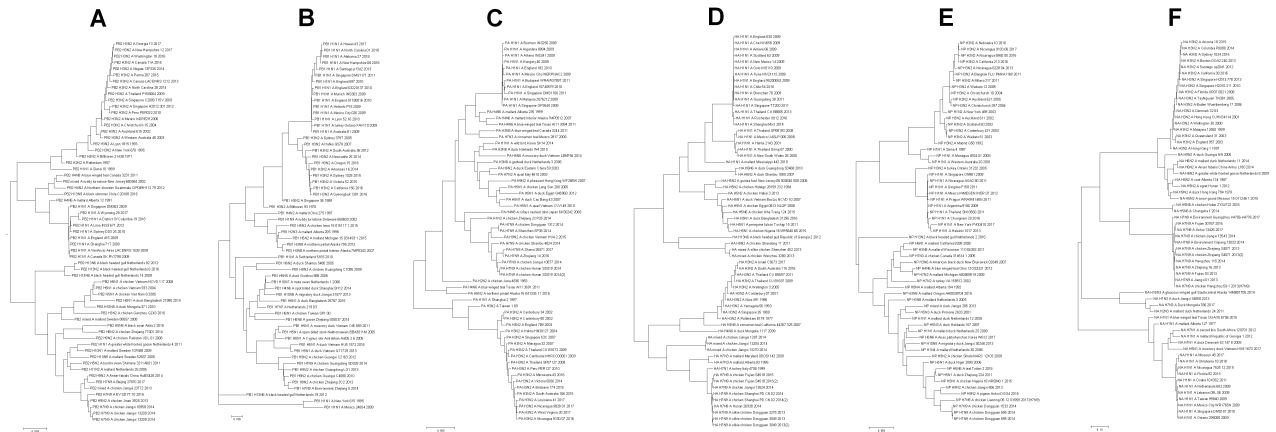

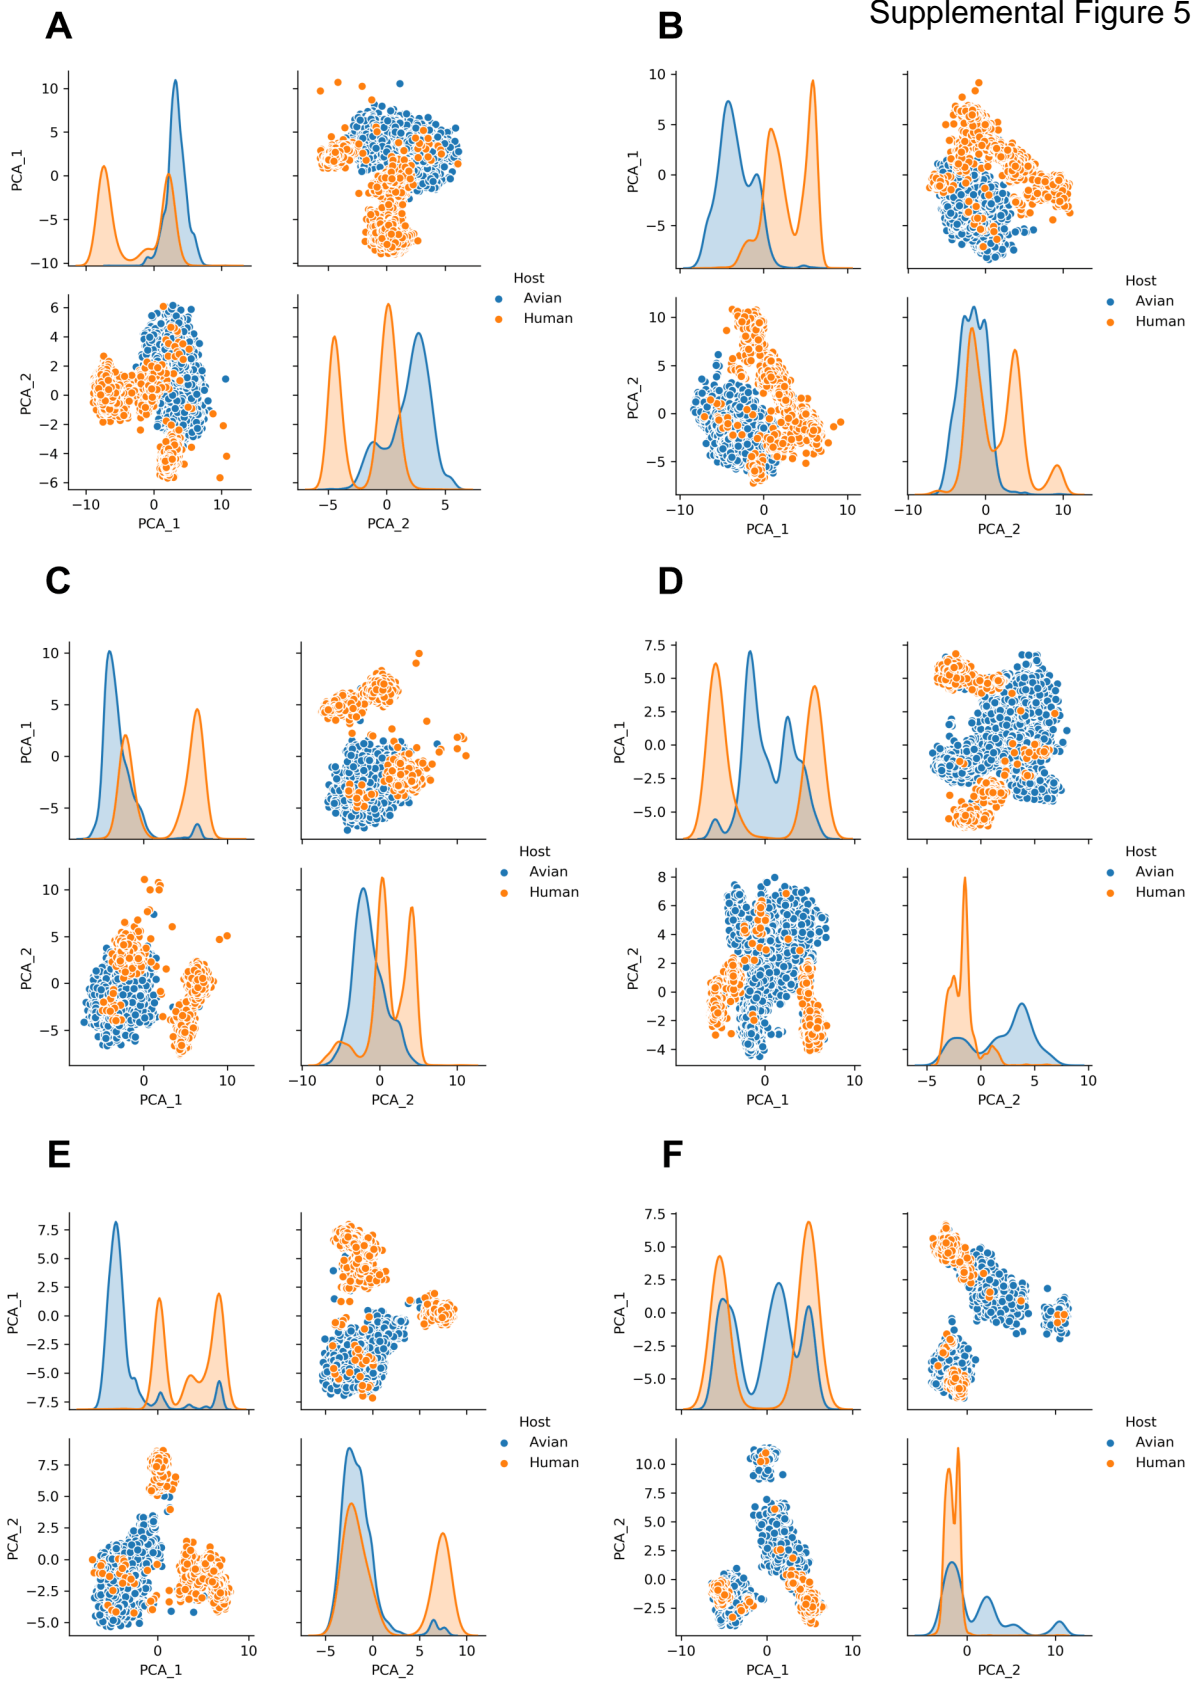



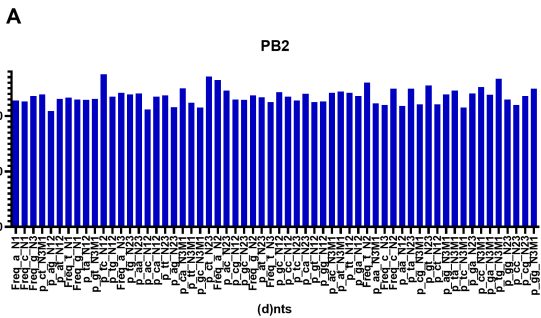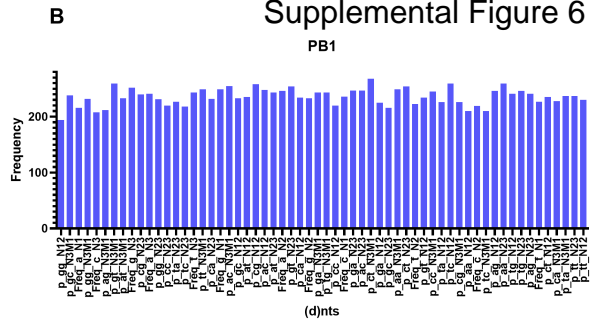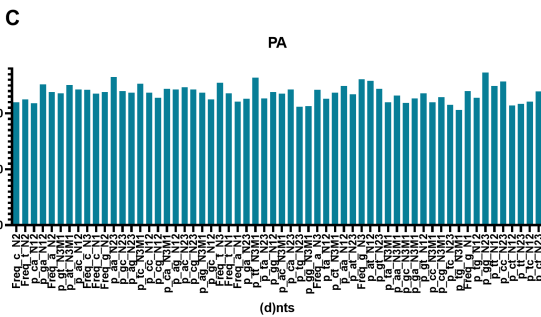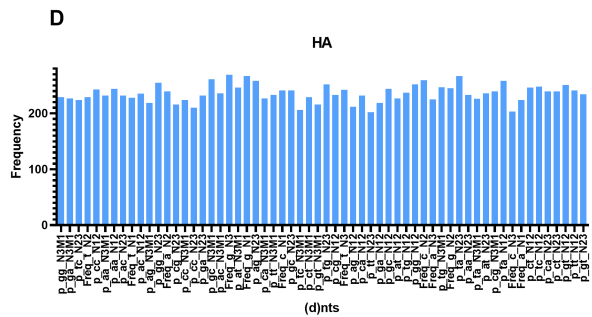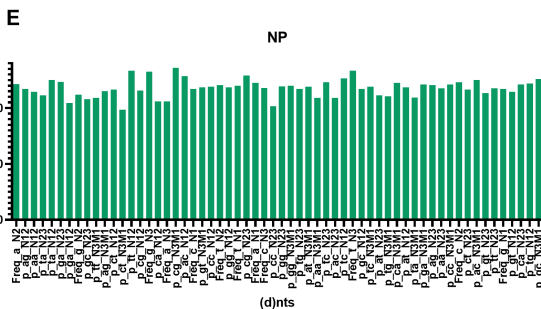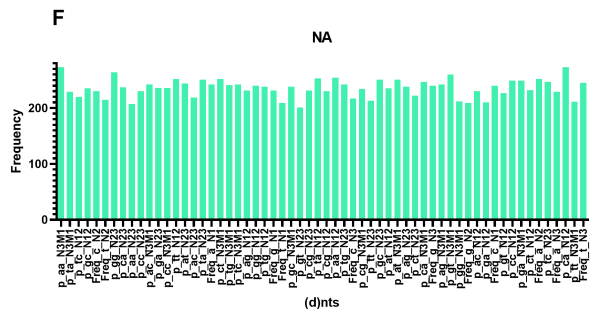



## Supplemental Figure 8

**A**

Boxplot of the optimized (d)ntfs for PB2

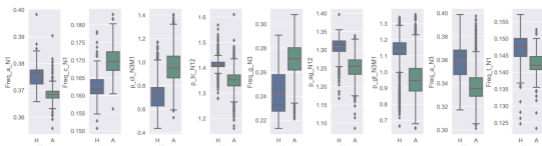**B**

Boxplot of the optimized (d)ntfs for PB1

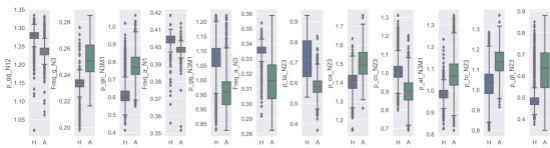**C**

Boxplot of the optimized (d)ntfs for PA

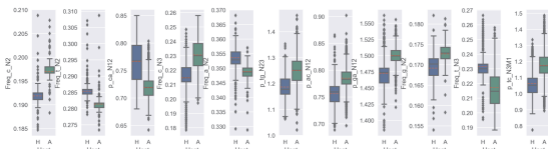**D**

Boxplot of the optimized (d)ntfs for HA

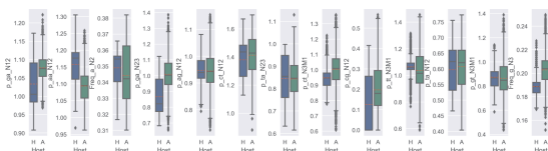**E**

Boxplot of the optimized (d)ntfs for NP

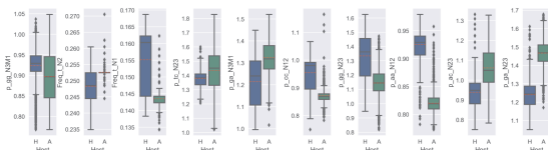**F**

Boxplot of the optimized (d)ntfs for NA

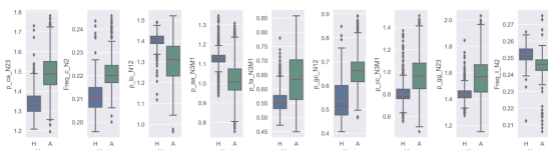

## Supplemental Figure 9

**A**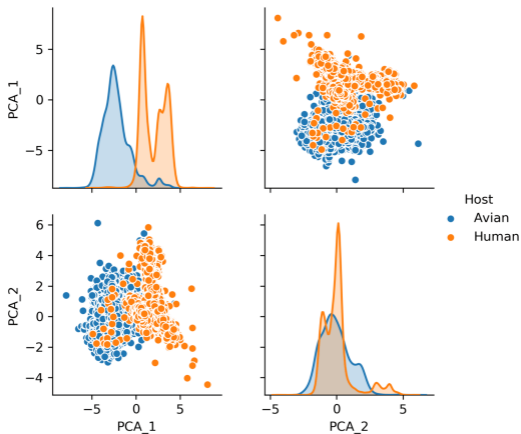**B**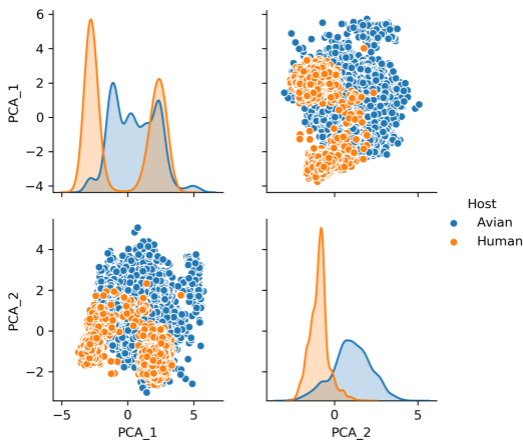

# Supplemental Figure 10

## A

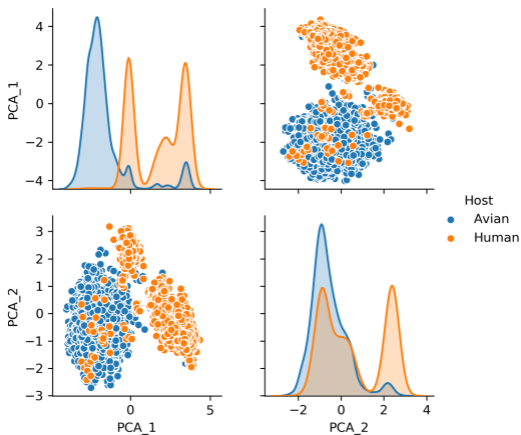

## B

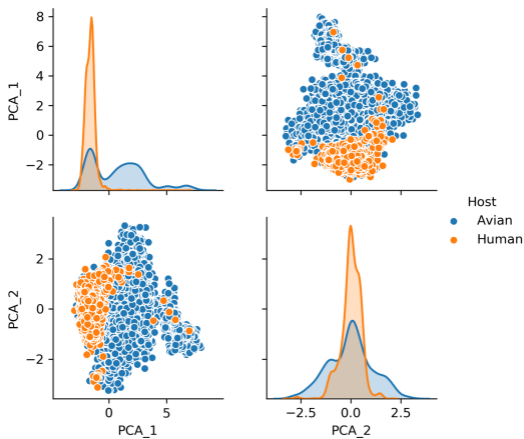

Re-sampling size = 0.00365

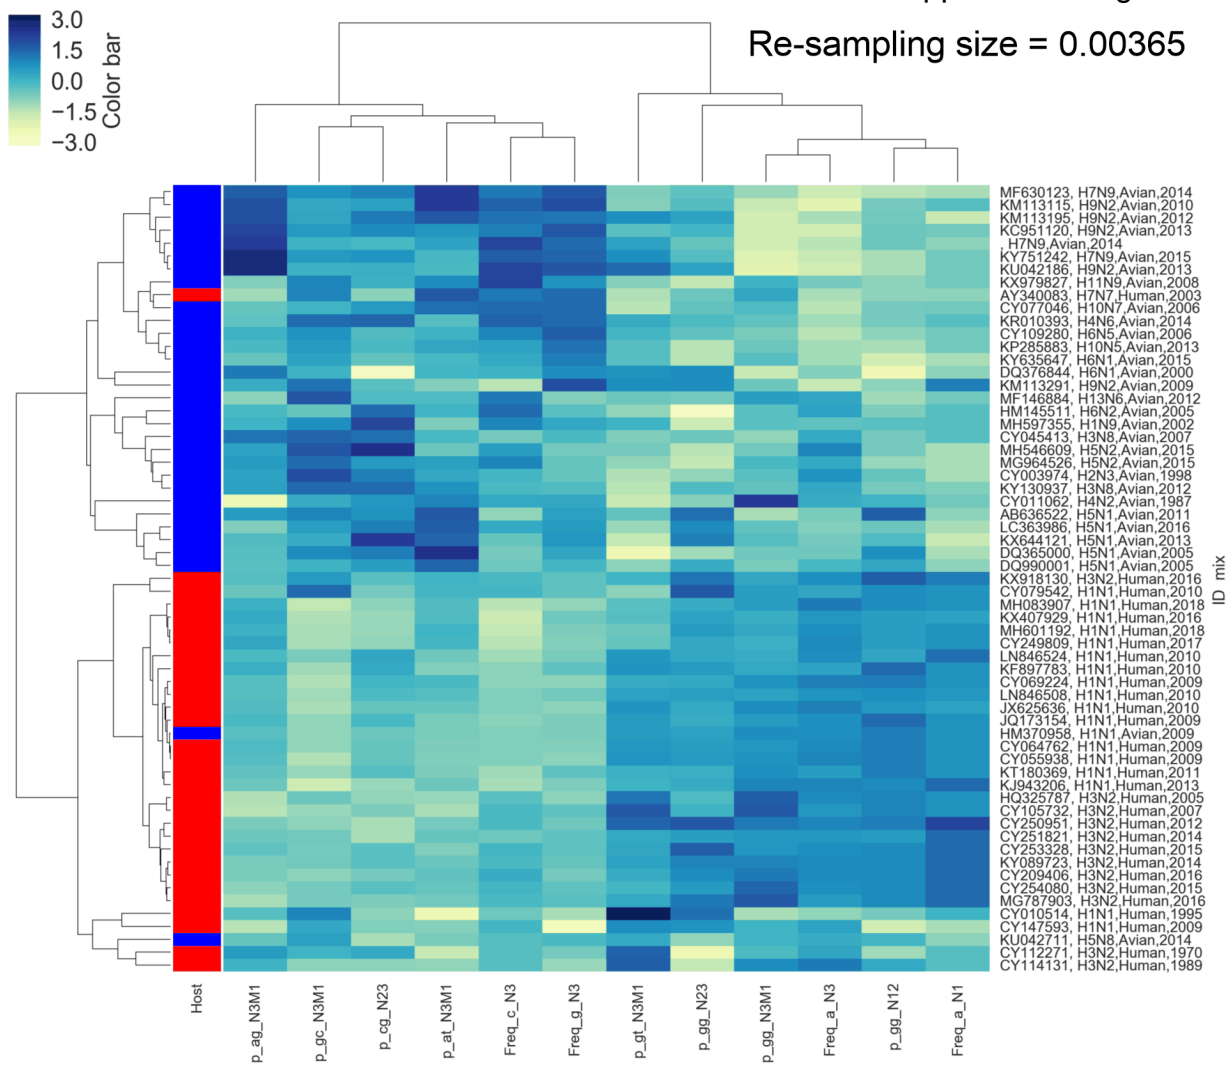

Re-sampling size = 0.00372

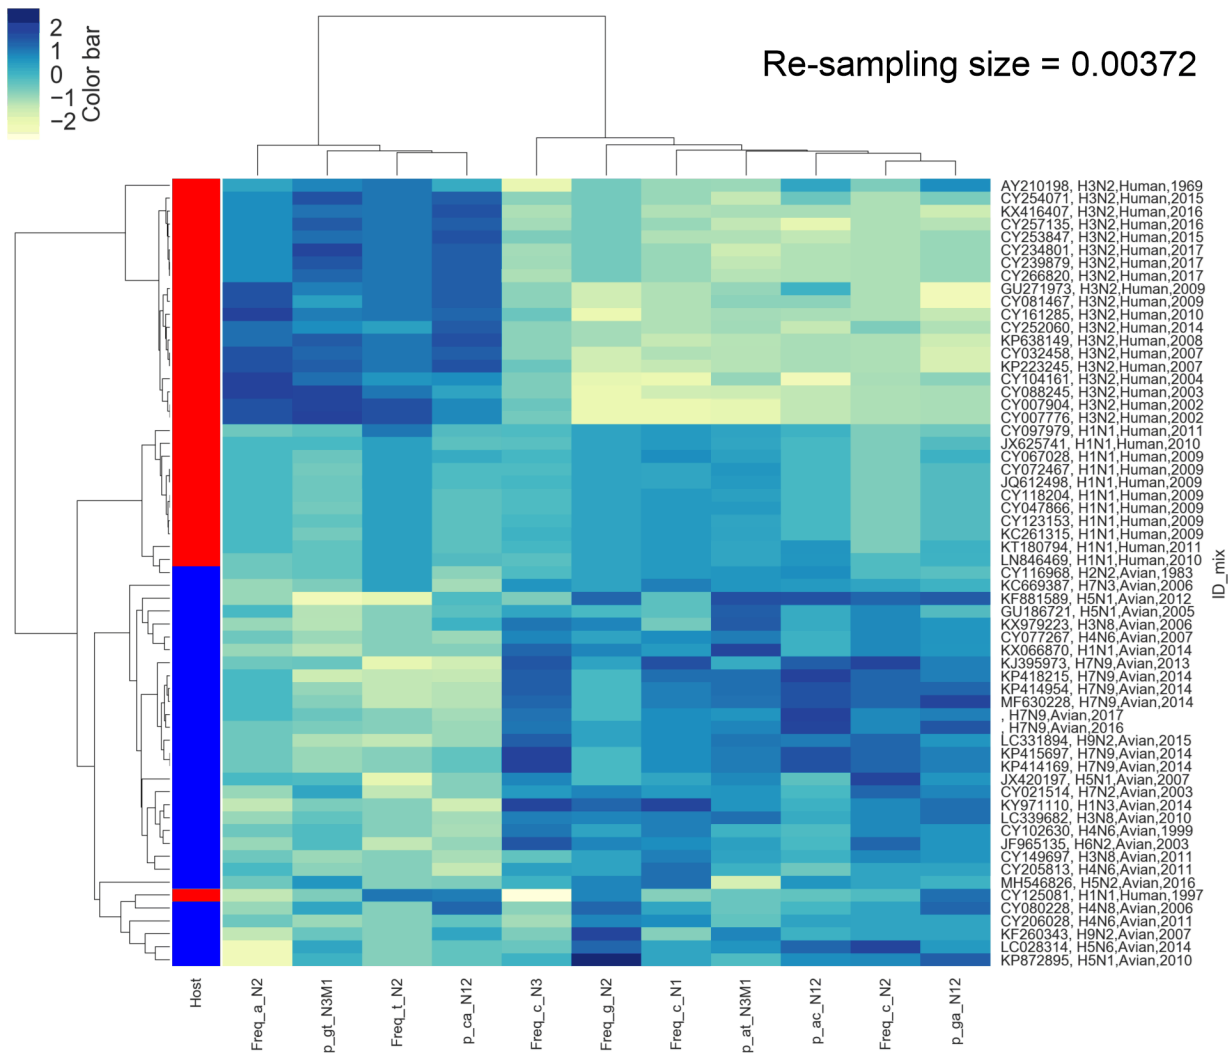

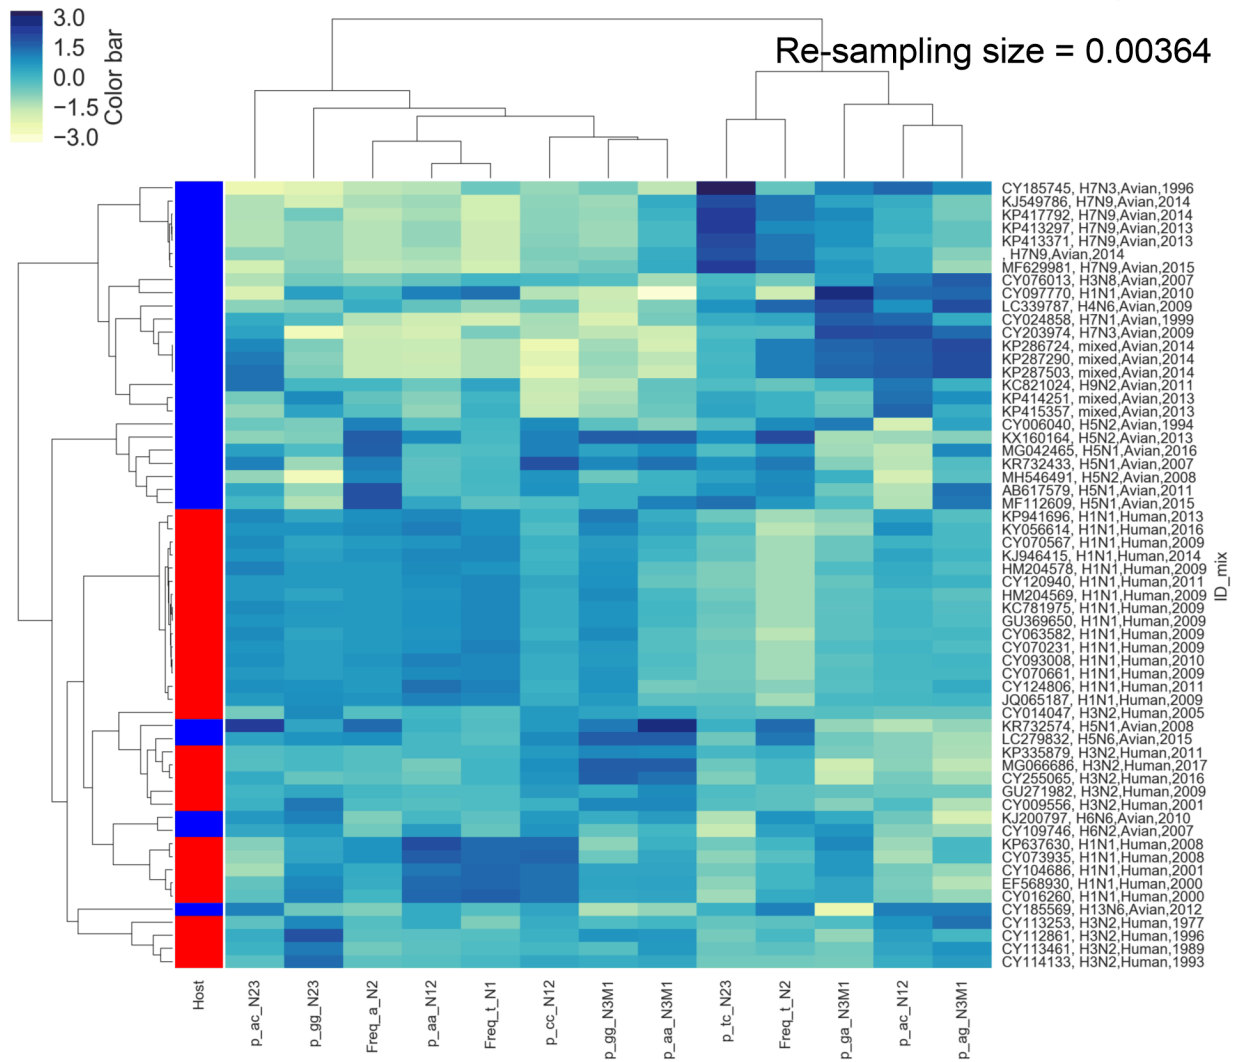



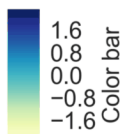

Re-sampling size = 0.00405

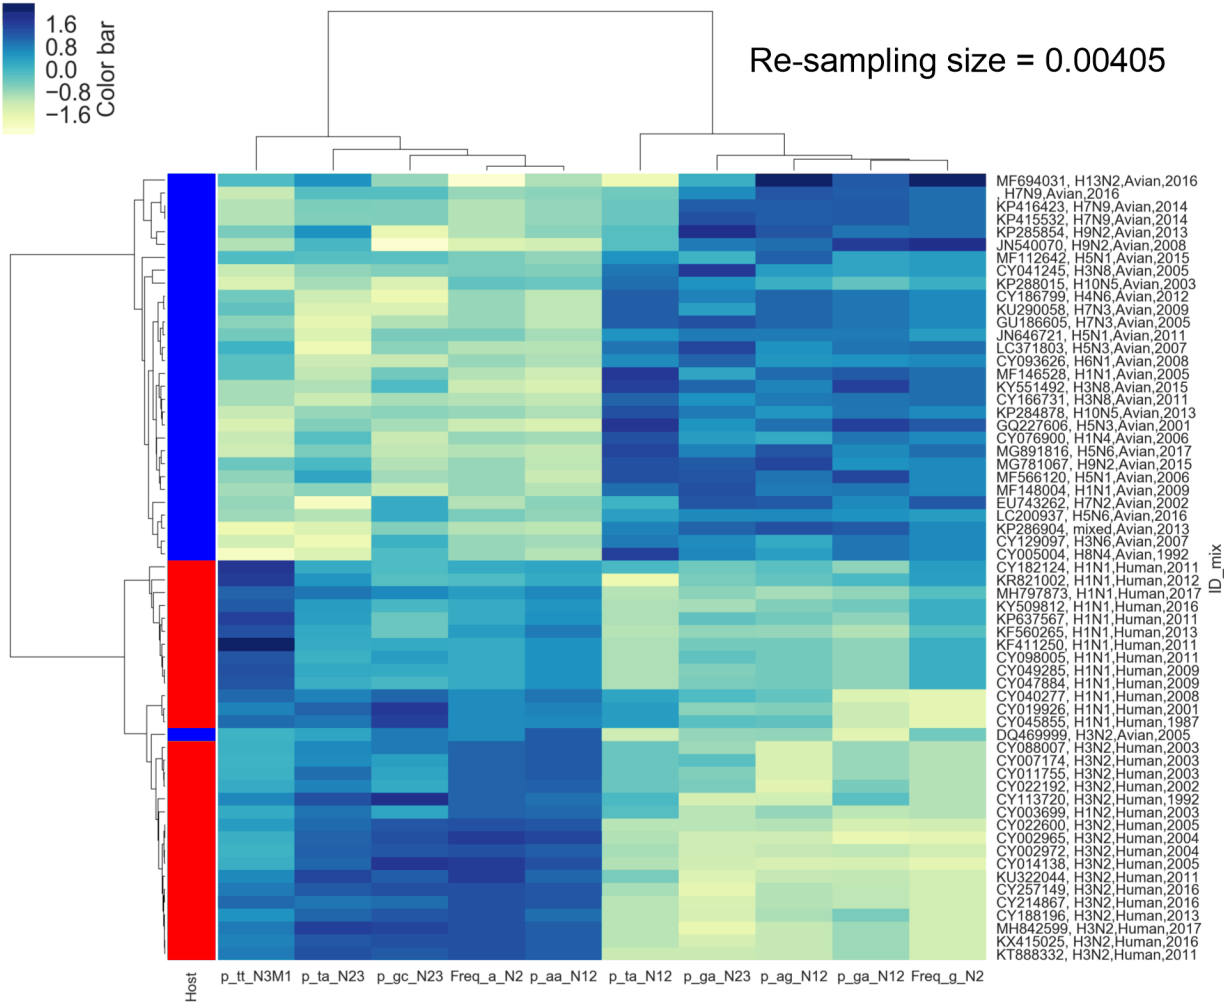

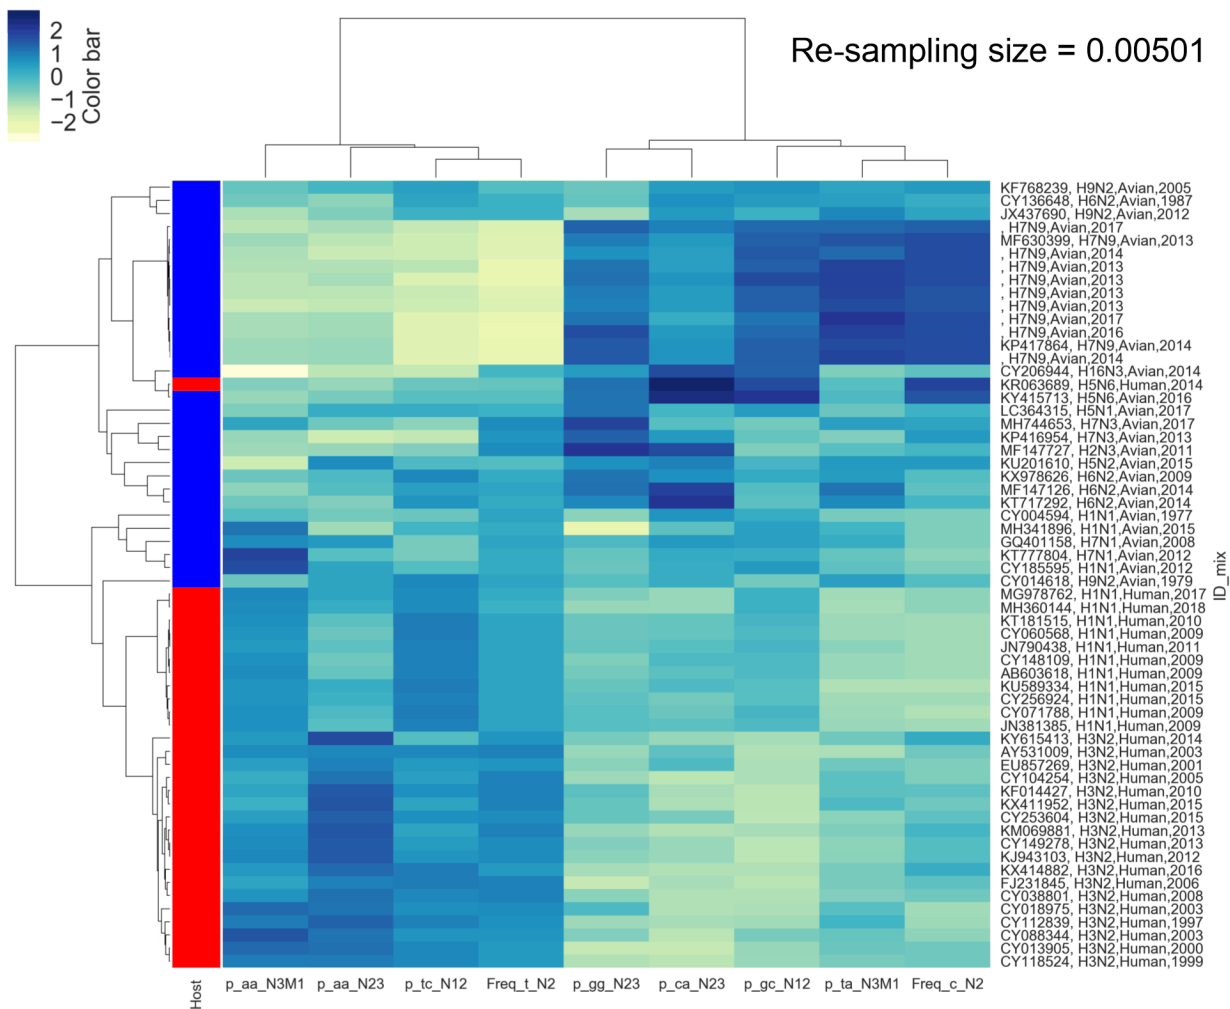

**A****GBRT for PB2, with the 9 worst (d)nts**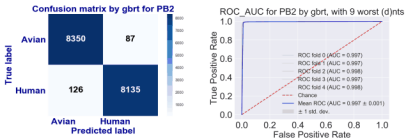**GBRT for PB2, with the 9 best (d)nts**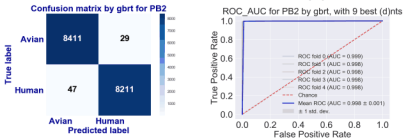**C****GBRT for PA, with the 11 worst (d)nts**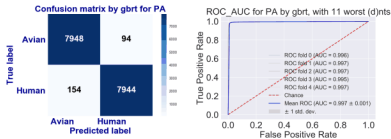**GBRT for PA, with the 11 best (d)nts**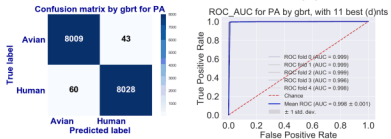**E Supplemental Figure 16****GBRT for NP, with the 10 worst (d)nts**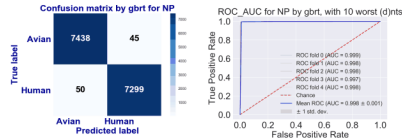**GBRT for NP, with the 10 best (d)nts**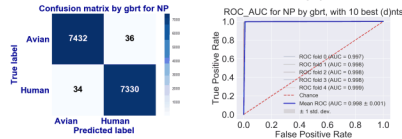**B****GBRT for PB1, with the 12 worst (d)nts**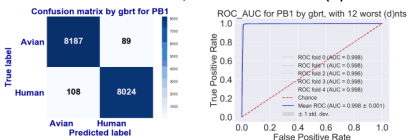**GBRT for PB1, with the 12 best (d)nts**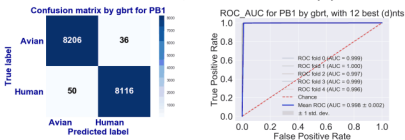**D****GBRT for HA, with the 13 worst (d)nts**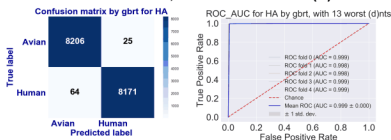**GBRT for HA, with the 13 best (d)nts**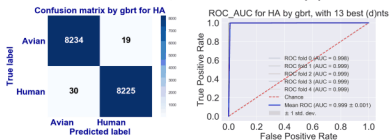**F****GBRT for NA, with the 9 worst (d)nts**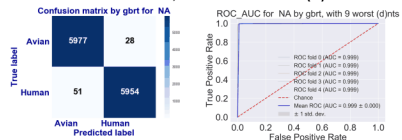**GBRT for NA, with the 9 best (d)nts**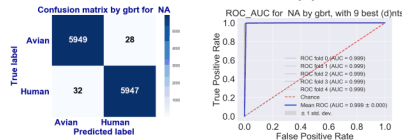

**A****MLP for PB2, with the 9 worst (d)nts**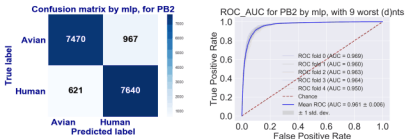**MLP for PB2, with the 9 best (d)nts**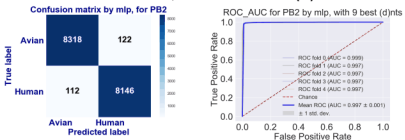**B****MLP for PB1, with the 12 worst (d)nts**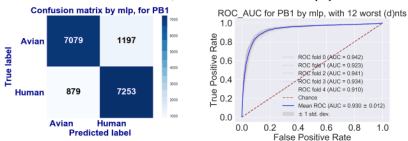**MLP for PB1, with the 12 best (d)nts**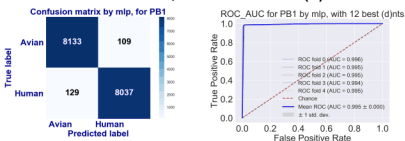**C****MLP for PA, with the 11 worst (d)nts**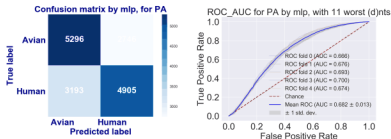**MLP for PA, with the 11 best (d)nts**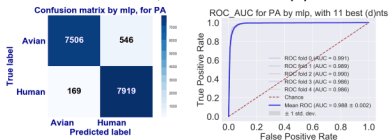**D****MLP for HA, with the 13 worst (d)nts**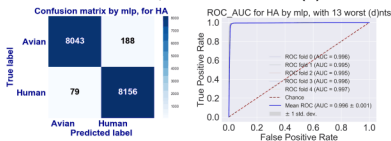**MLP for HA, with the 13 best (d)nts**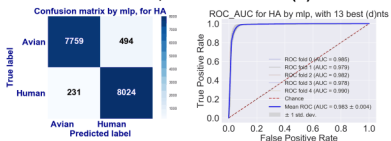**E Supplemental Figure 17****MLP for NP, with the 10 worst (d)nts**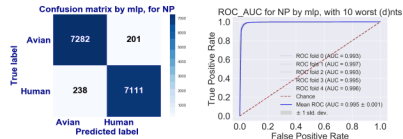**MLP for NP, with the 10 best (d)nts**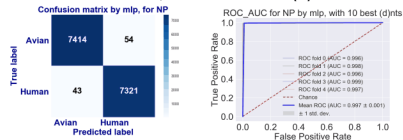**F****MLP for NA, with the 9 worst (d)nts**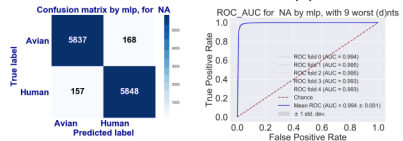**MLP for NA, with the 9 best (d)nts**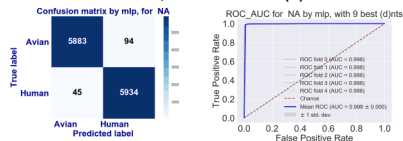

**A****SVC for PB2, with the 9 worst (d)nts**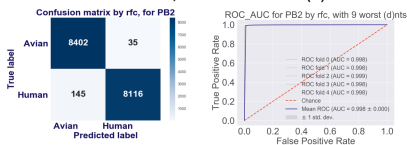**SVC for PB2, with the 9 best (d)nts**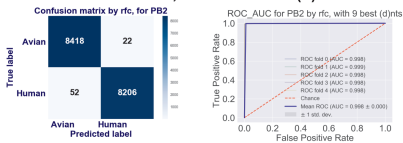**B****SVC for PB1, with the 12 worst (d)nts**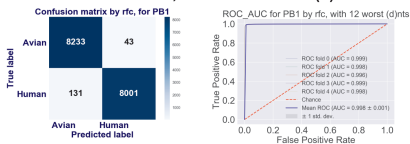**SVC for PB1, with the 12 best (d)nts**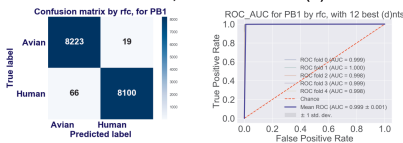**C****SVC for PA, with the 11 worst (d)nts**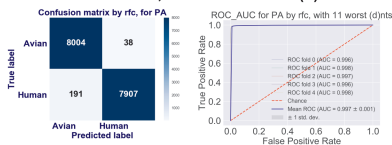**SVC for PA, with the 11 best (d)nts**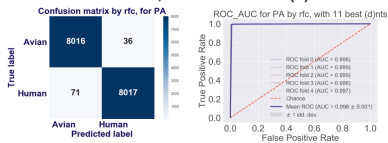**D****SVC for HA, with the 13 worst (d)nts**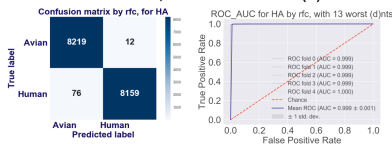**SVC for HA, with the 13 best (d)nts**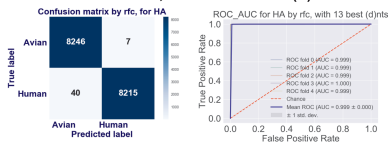**E Supplemental Figure 18****SVC for NP, with the 10 worst (d)nts**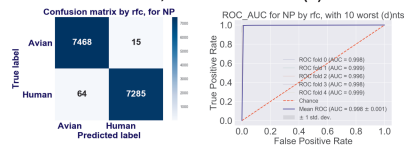**SVC for NP, with the 10 best (d)nts**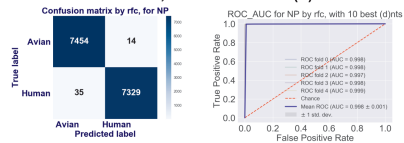**F****SVC for NA, with the 9 worst (d)nts**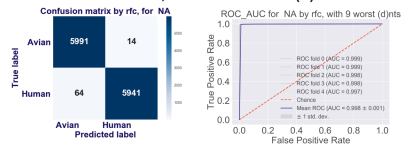**SVC for NA, with the 9 best (d)nts**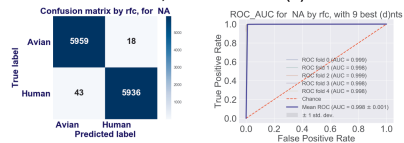

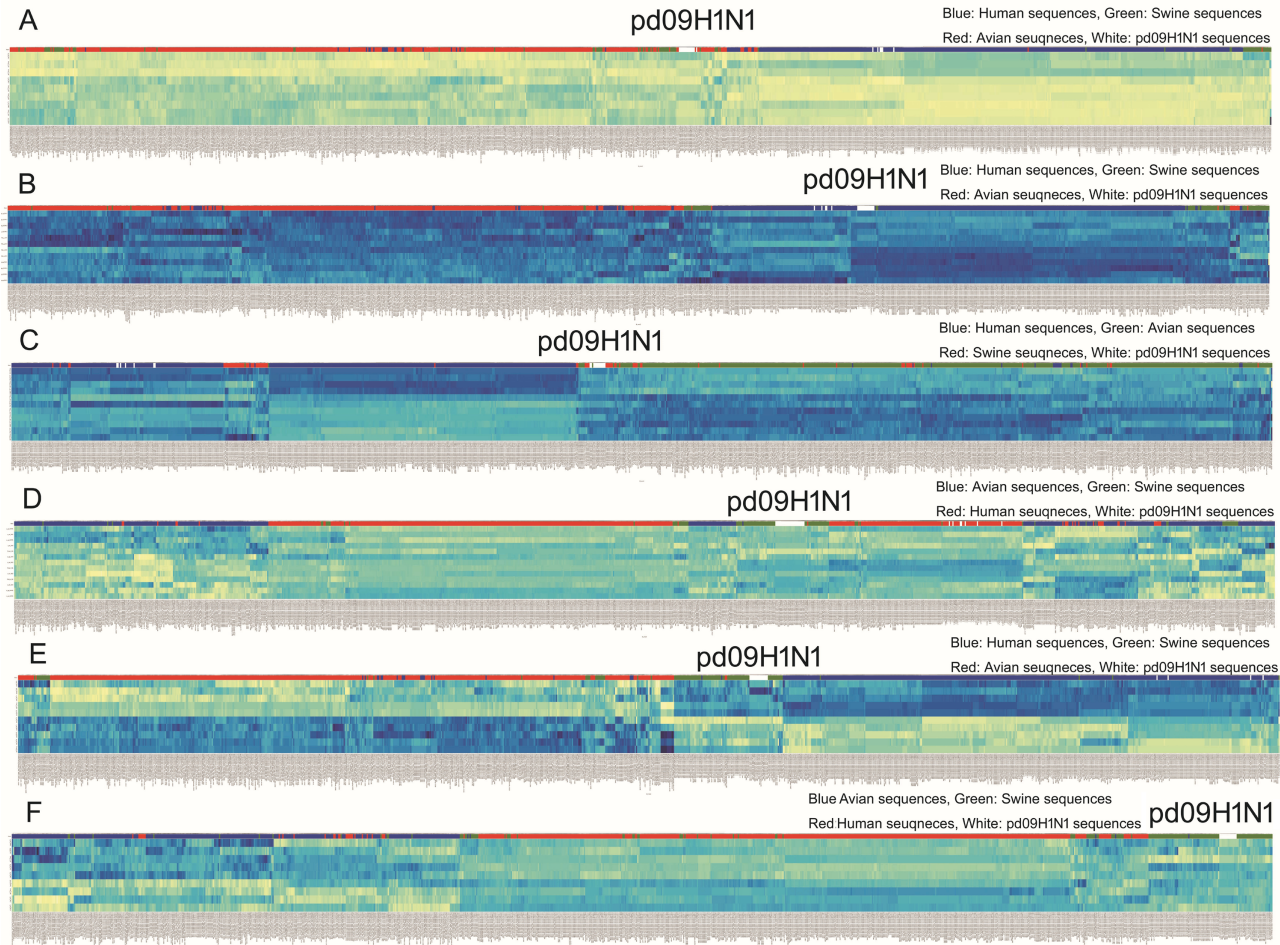

Supplement: msz276_supplementary_data.pdf [file msz276_supplementary_data.pdf]
